# Supplementary material for: Telomere-to-telomere genome assembly of Phaeodactylum tricornutum
Source: PeerJ journal article supplement (doi:10.7717/peerj.13607), 2022-07-05

### Chromosome 1

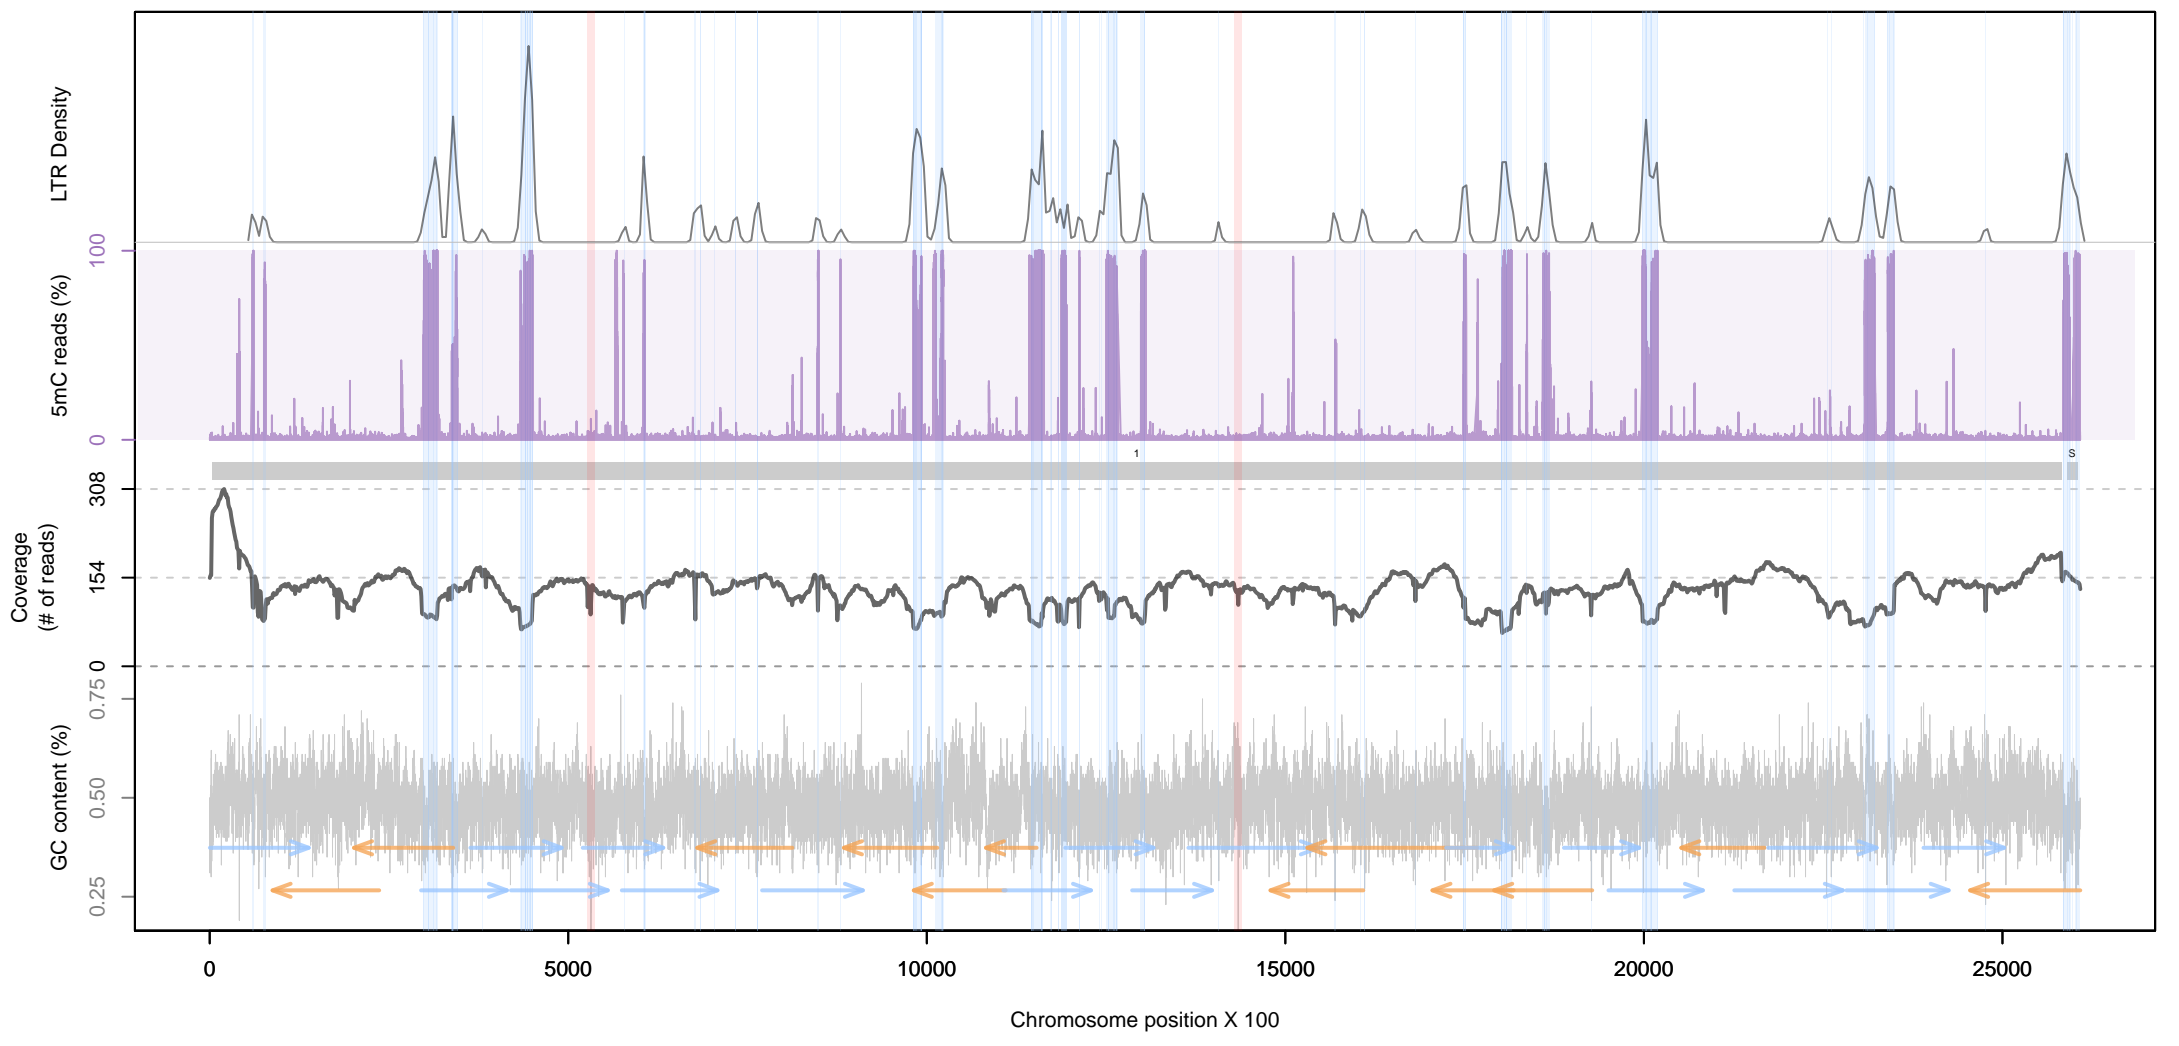

### Chromosome 2

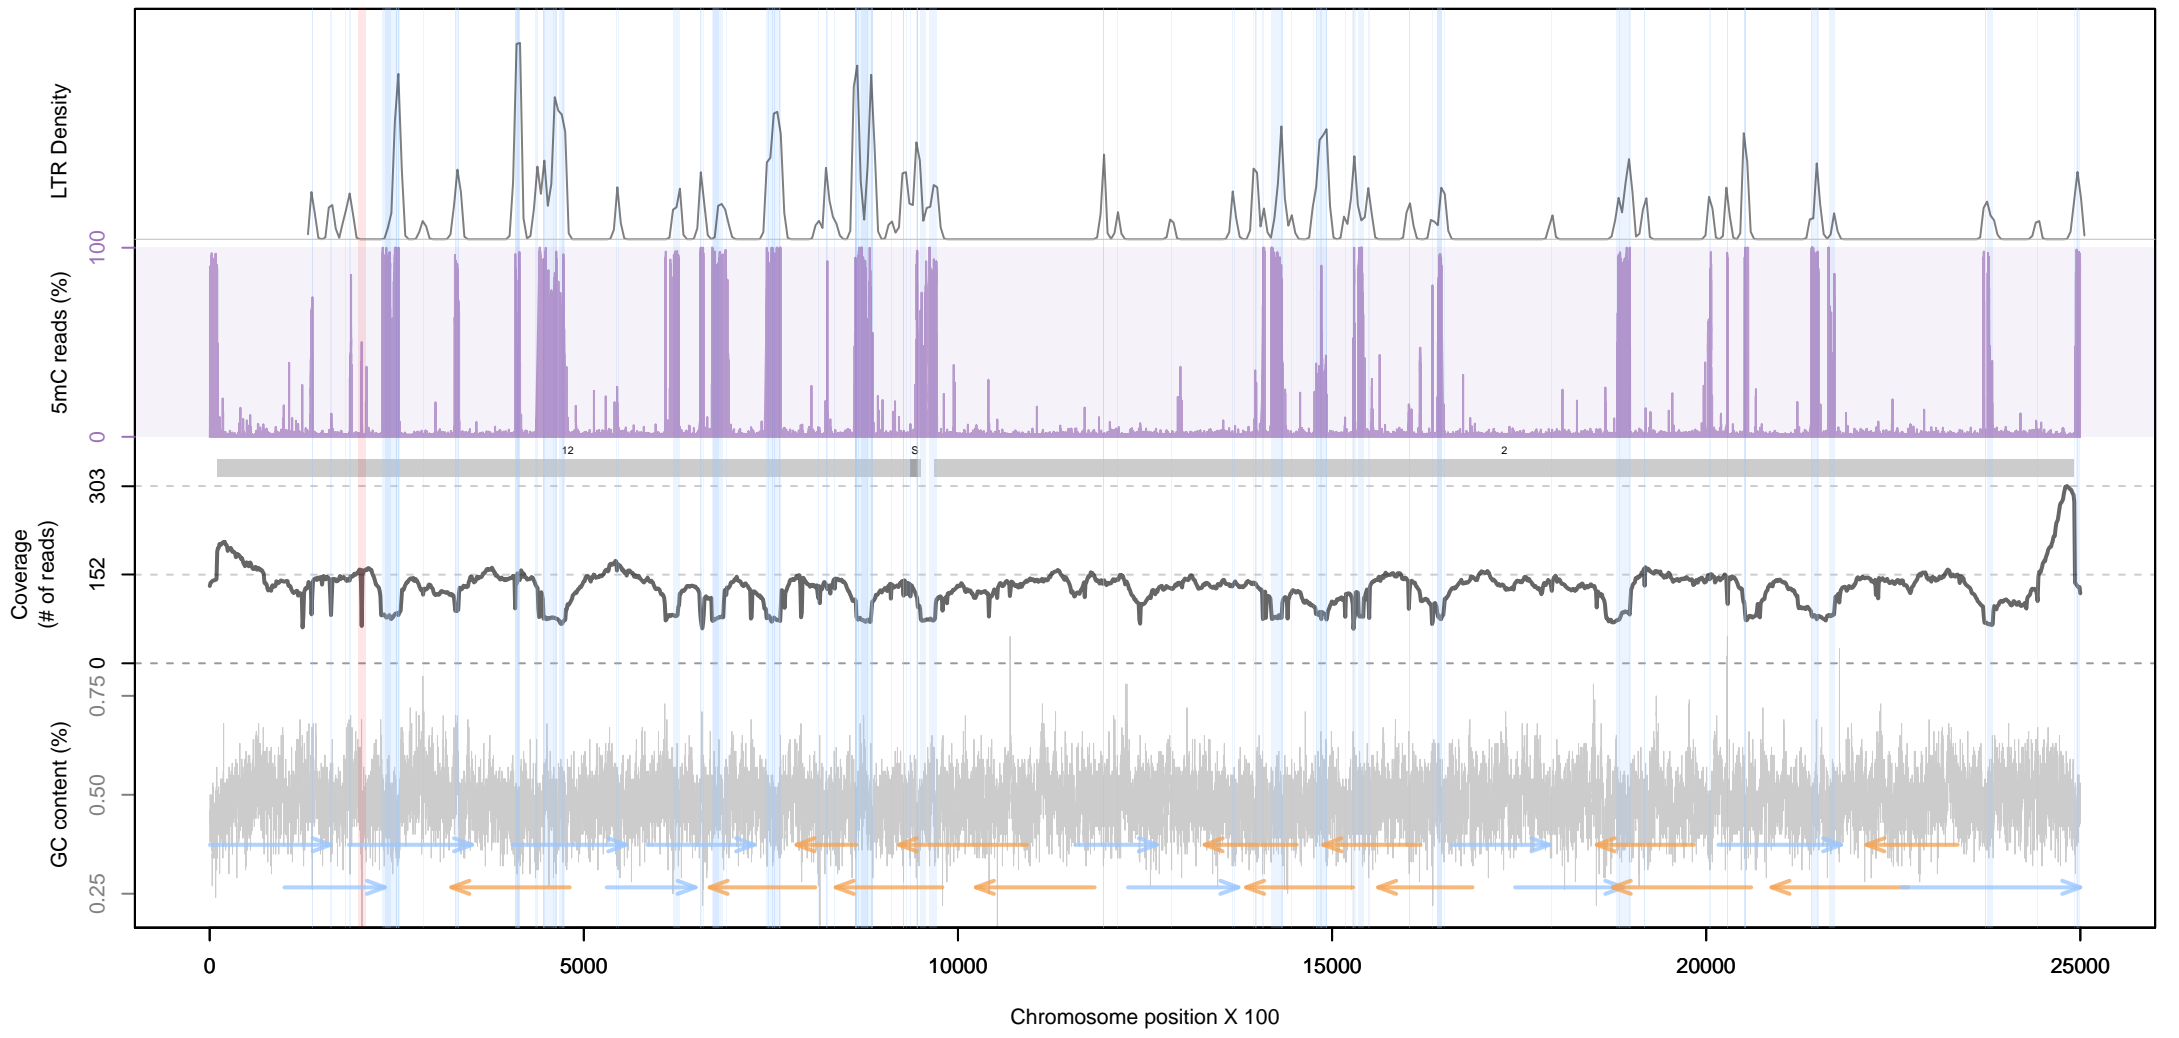

### Chromosome 3

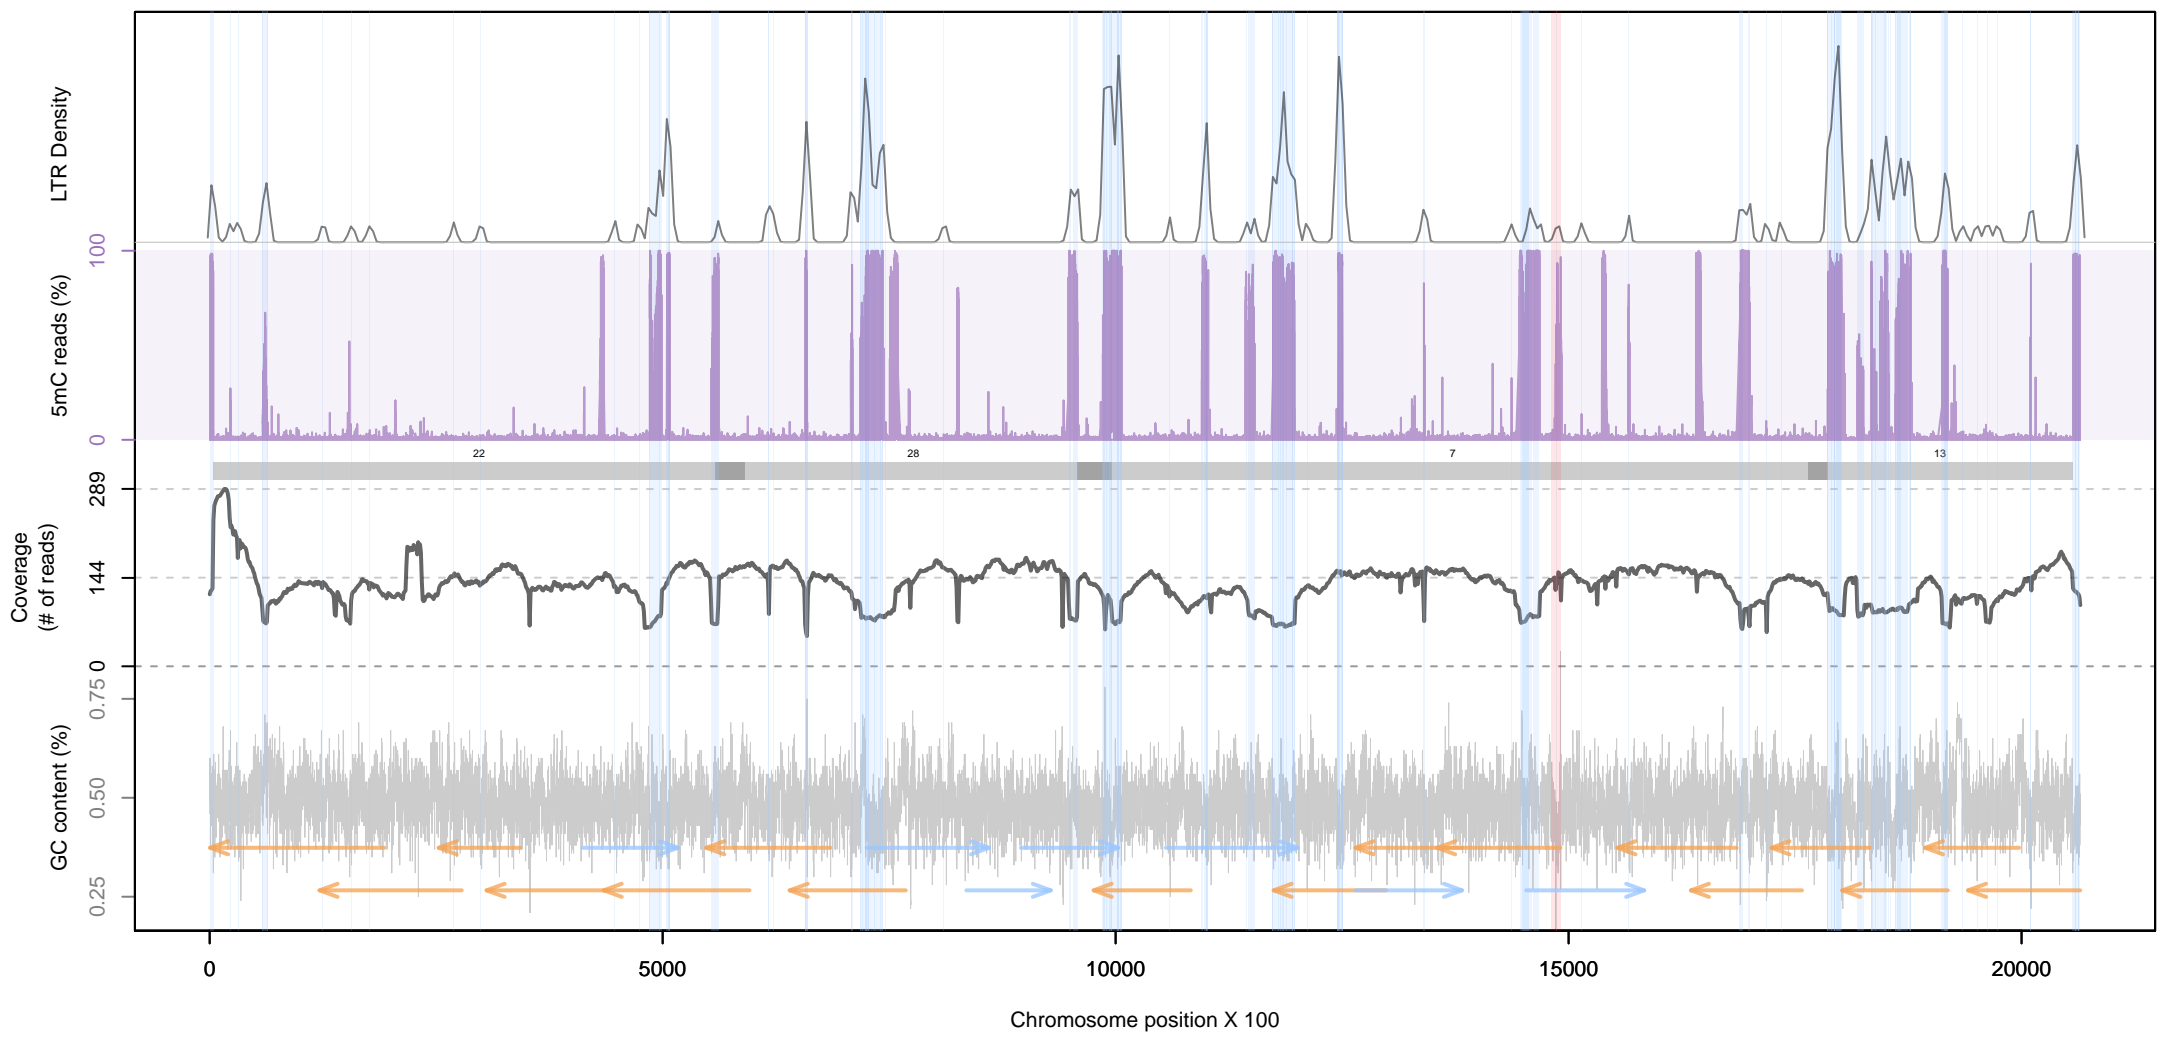

### Chromosome 4

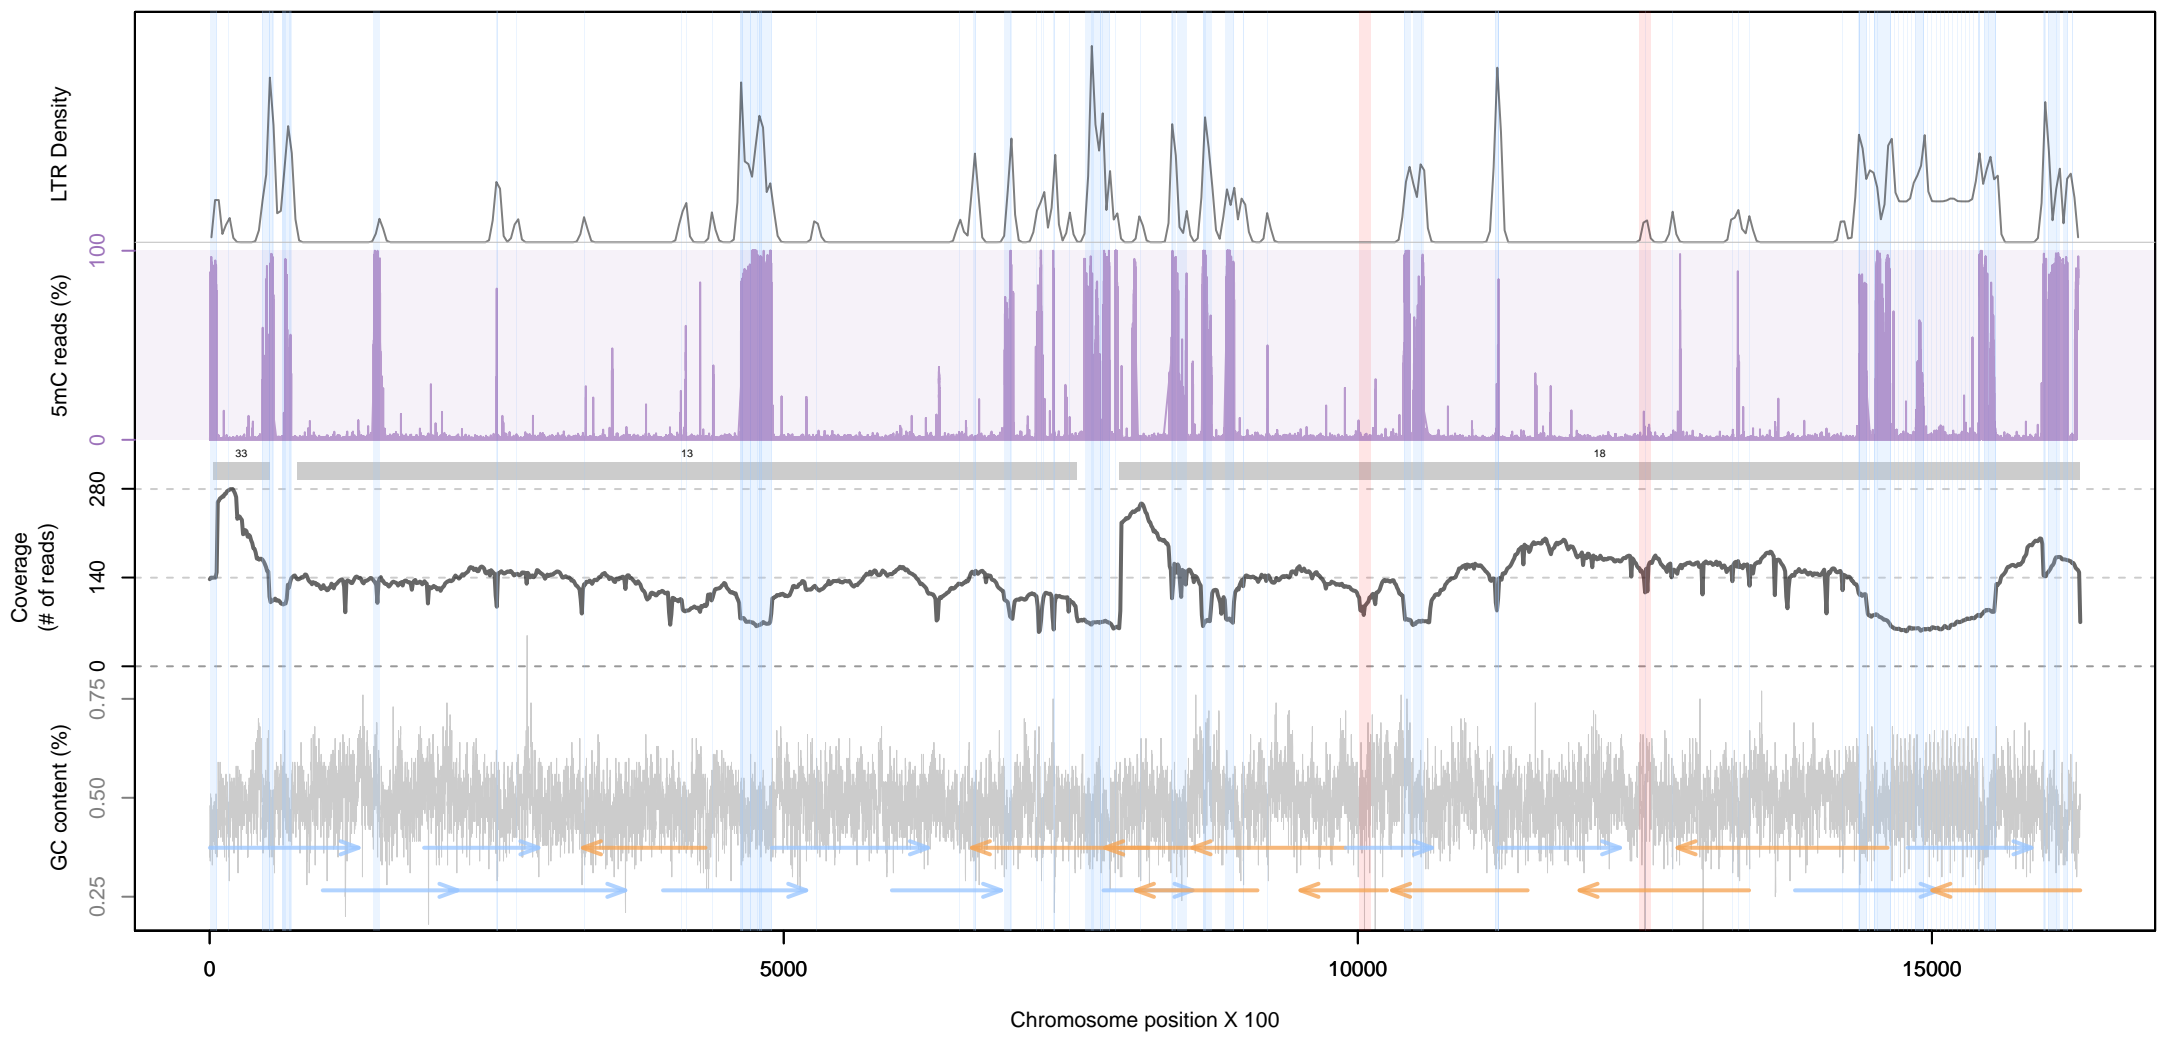

### Chromosome 5

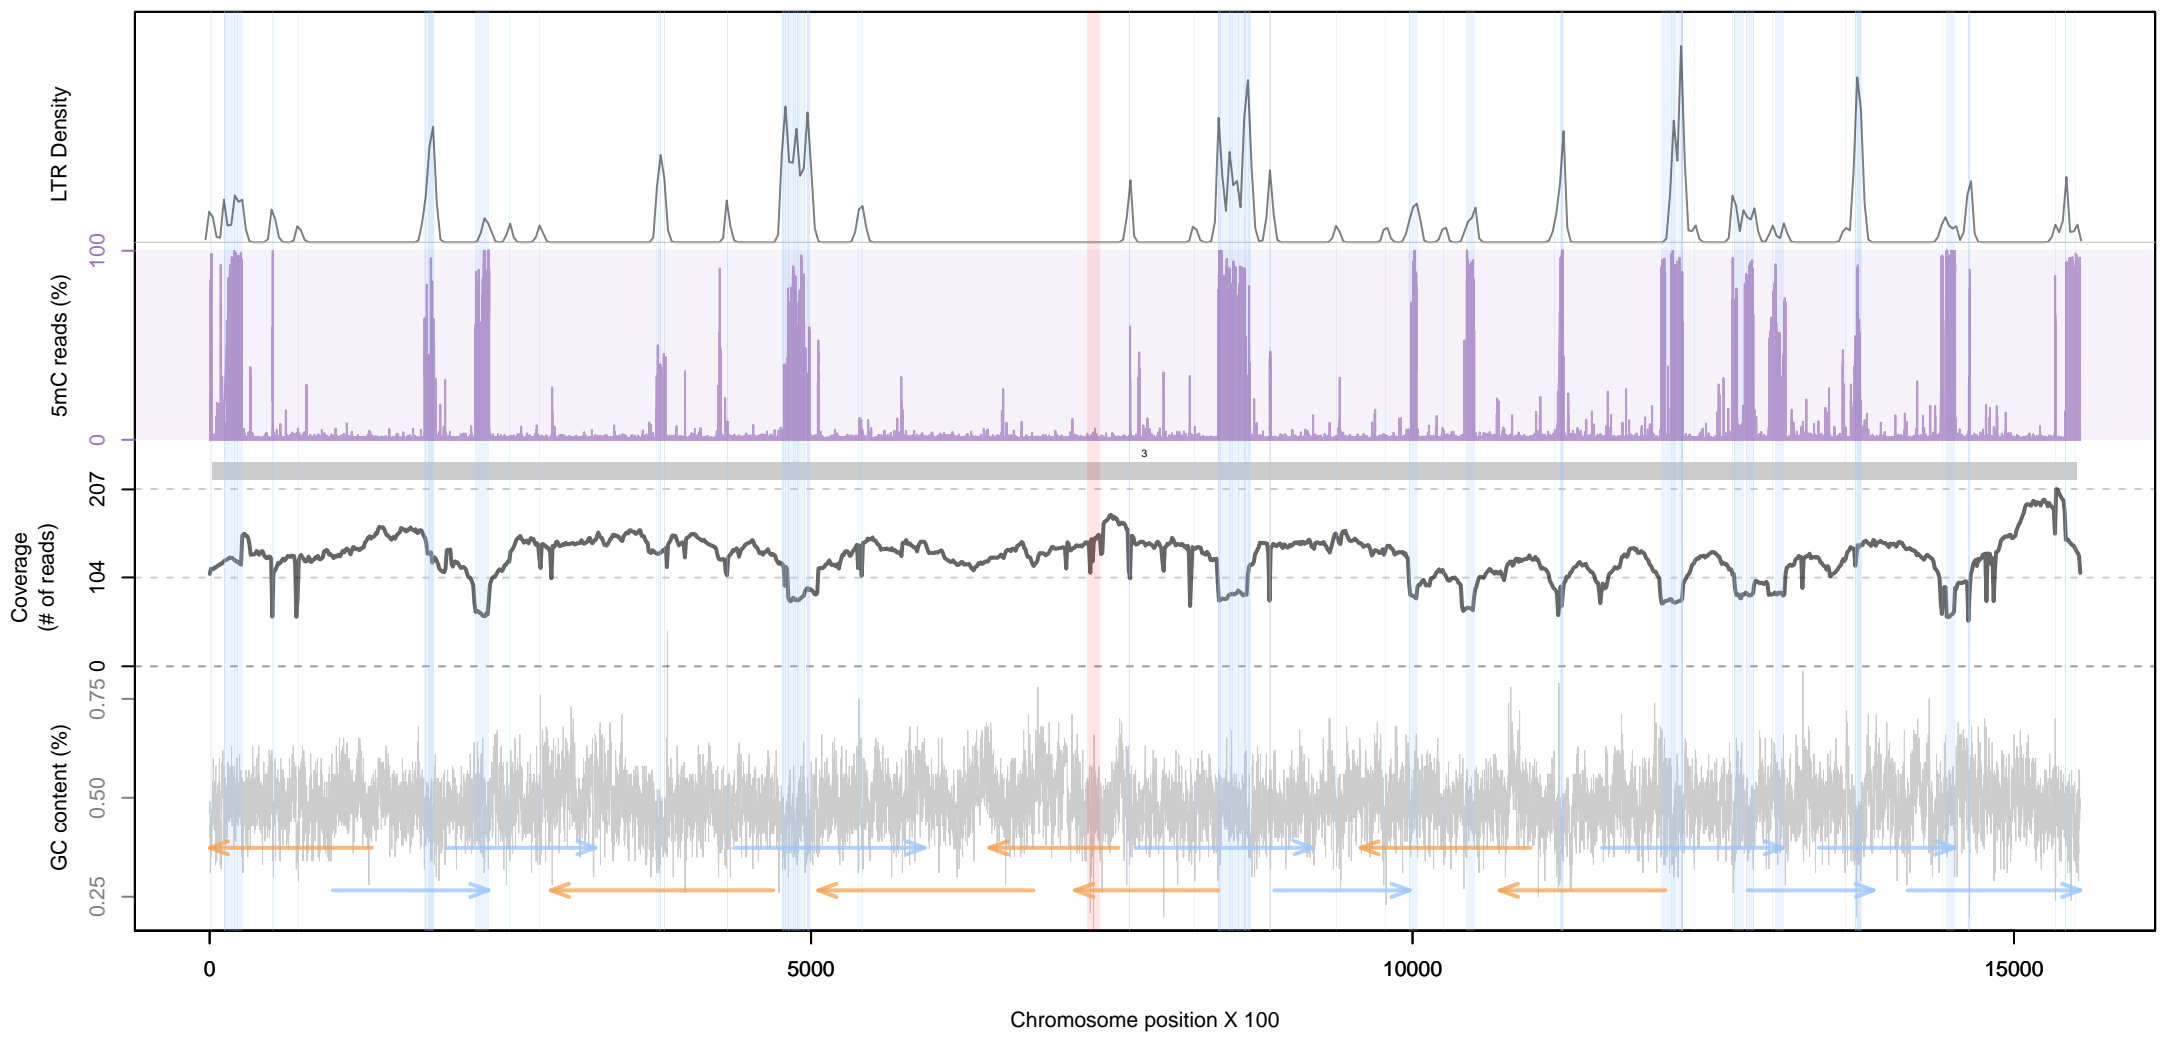

### Chromosome 6

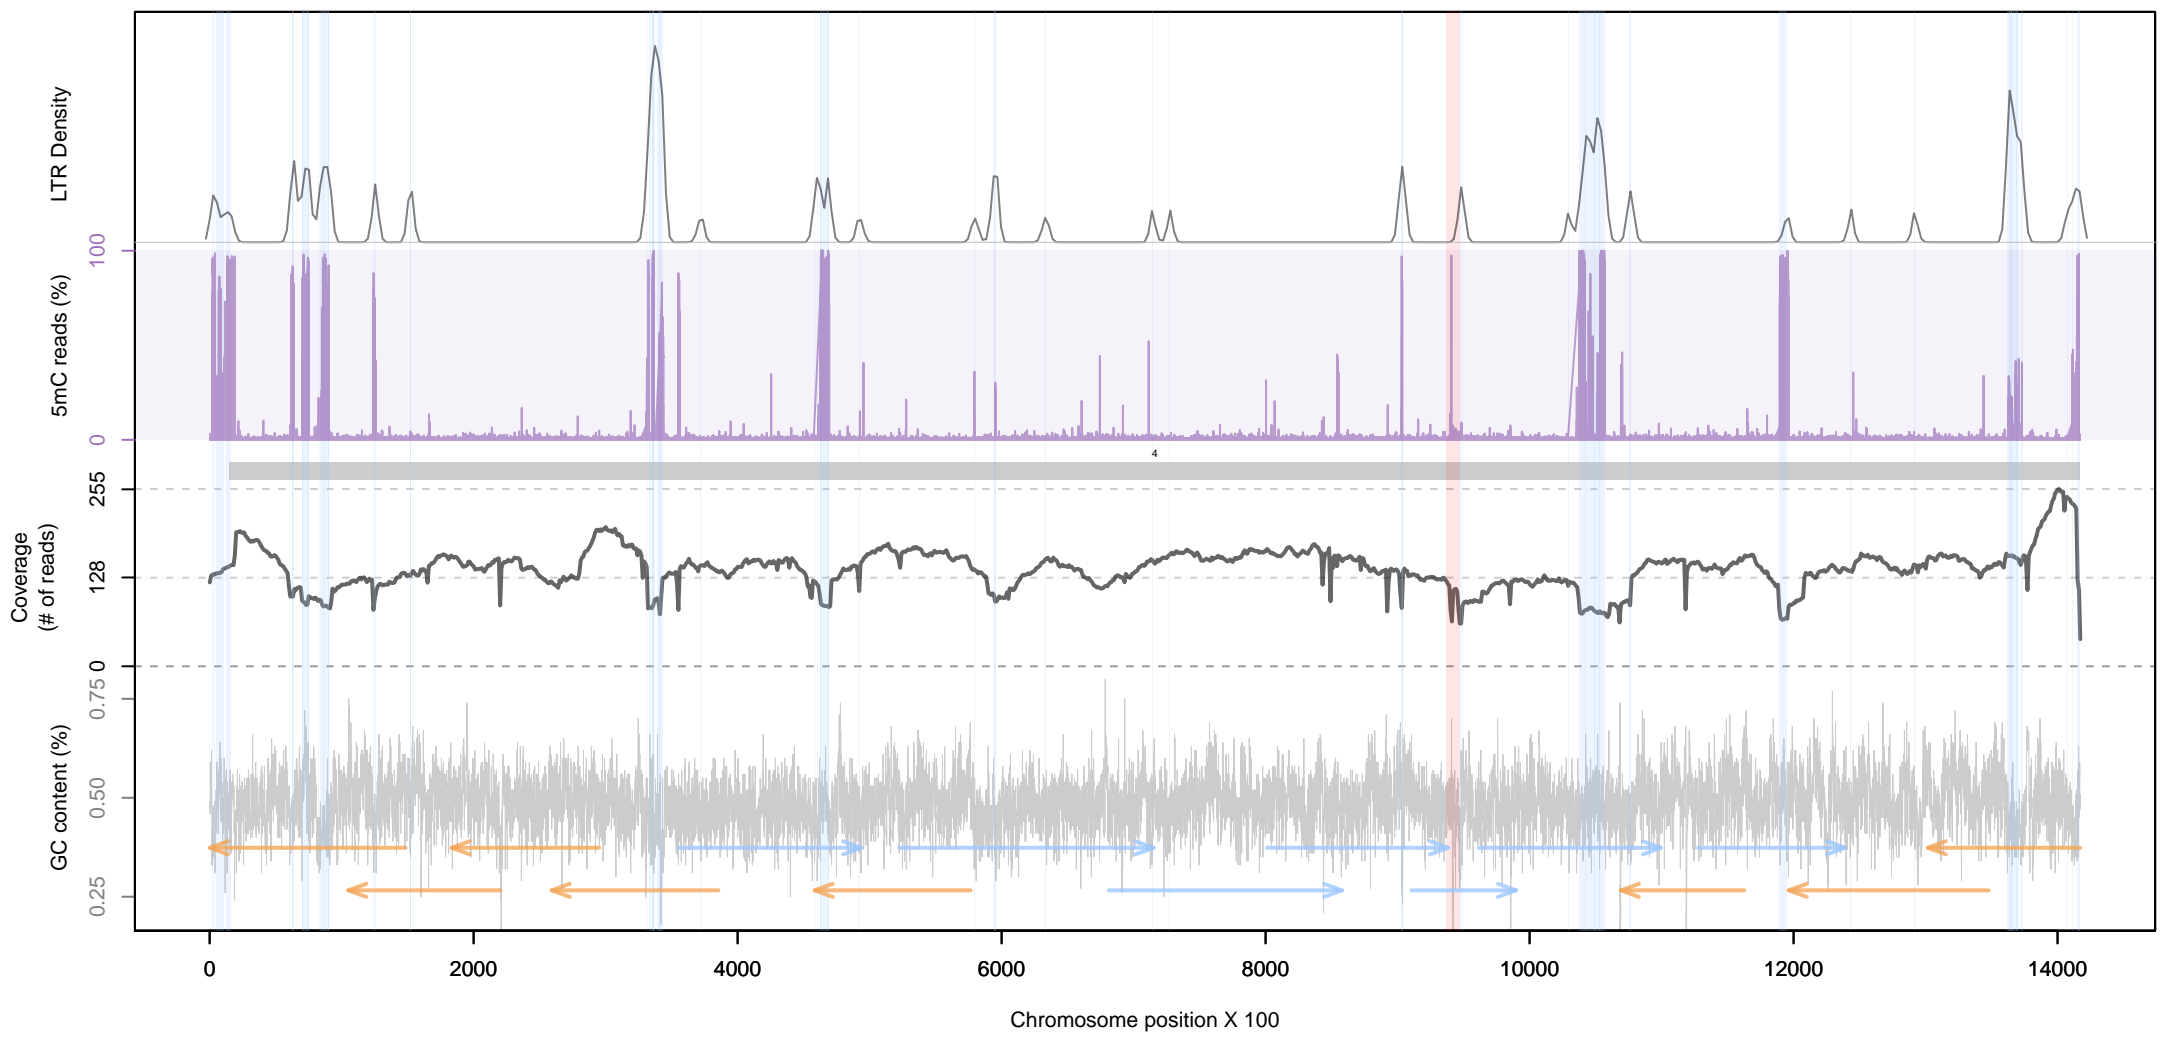

### Chromosome 7

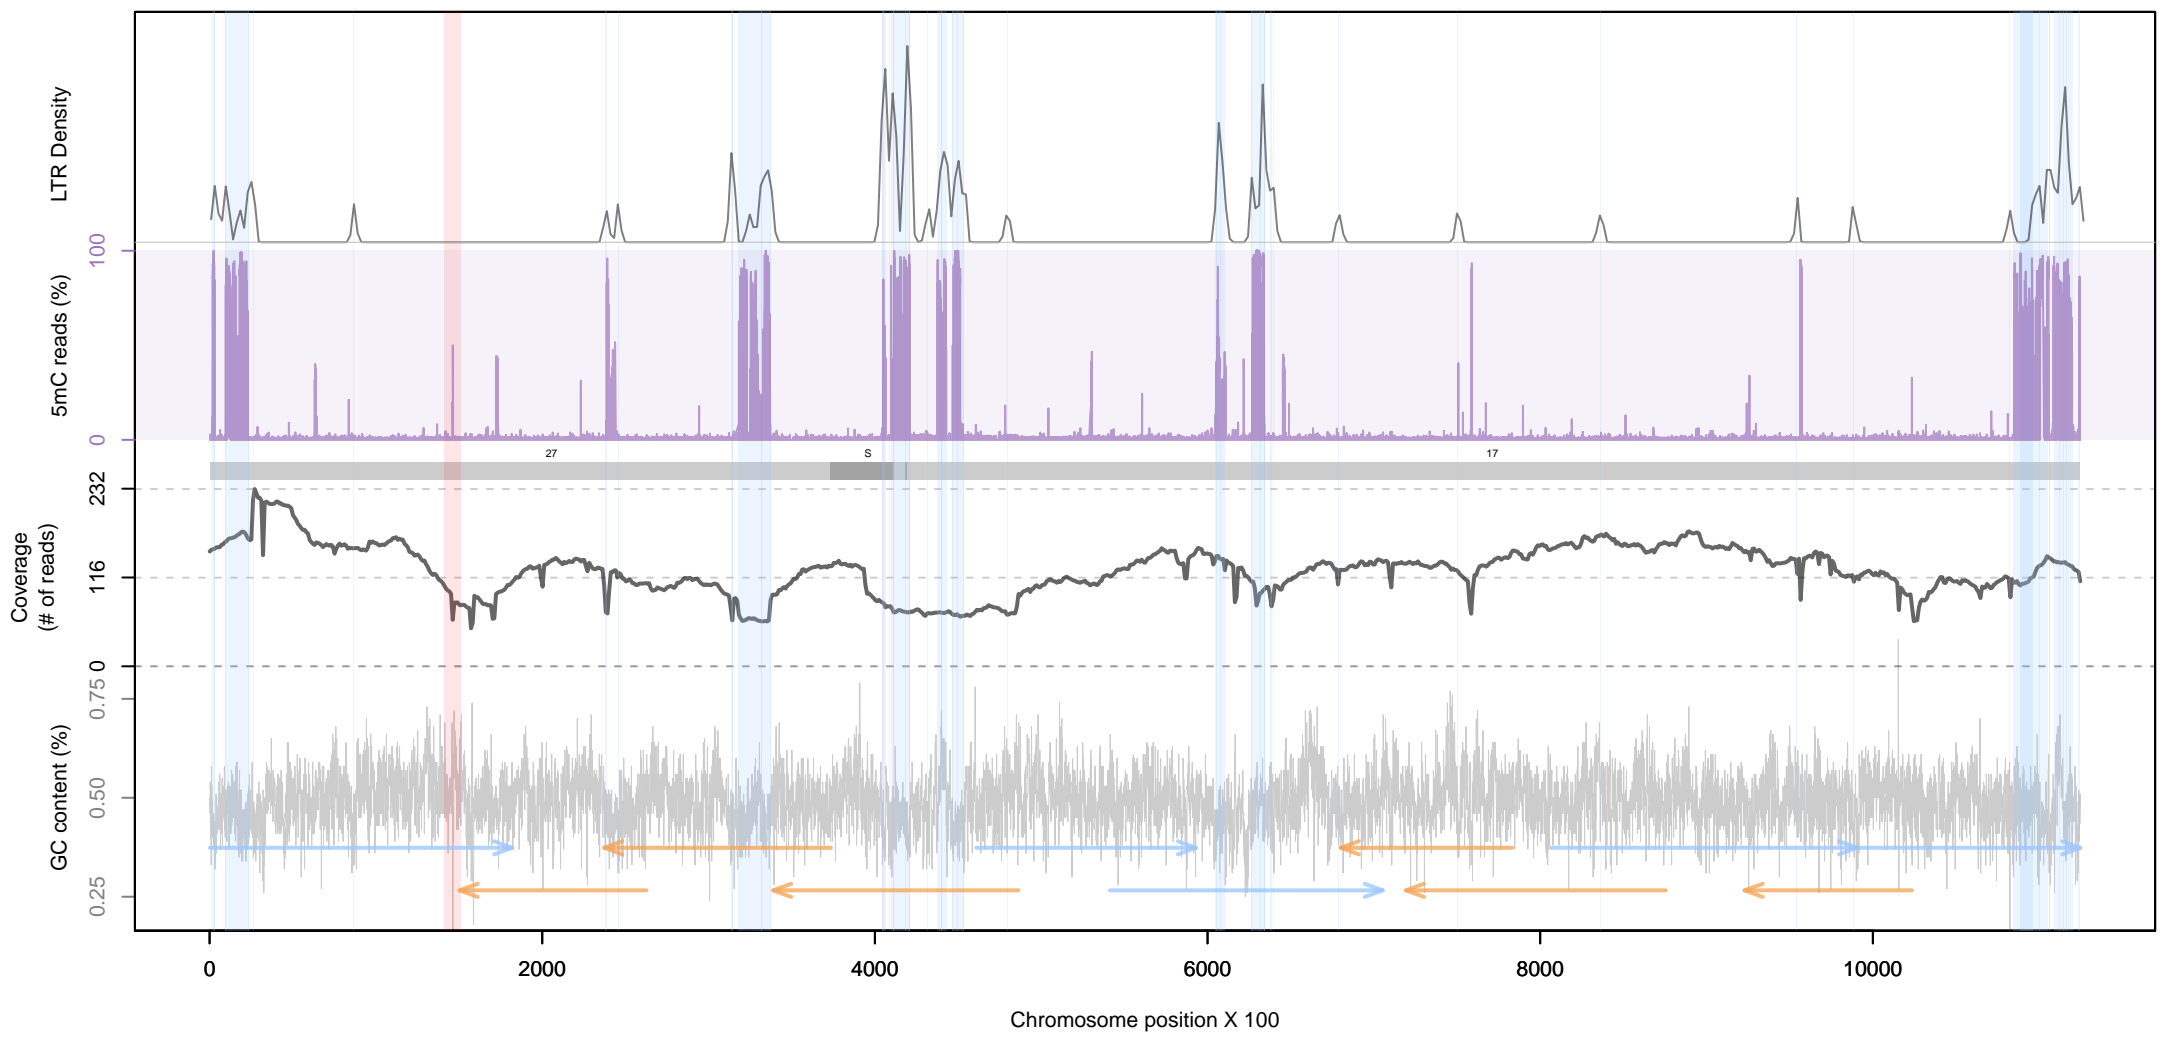

### Chromosome 8

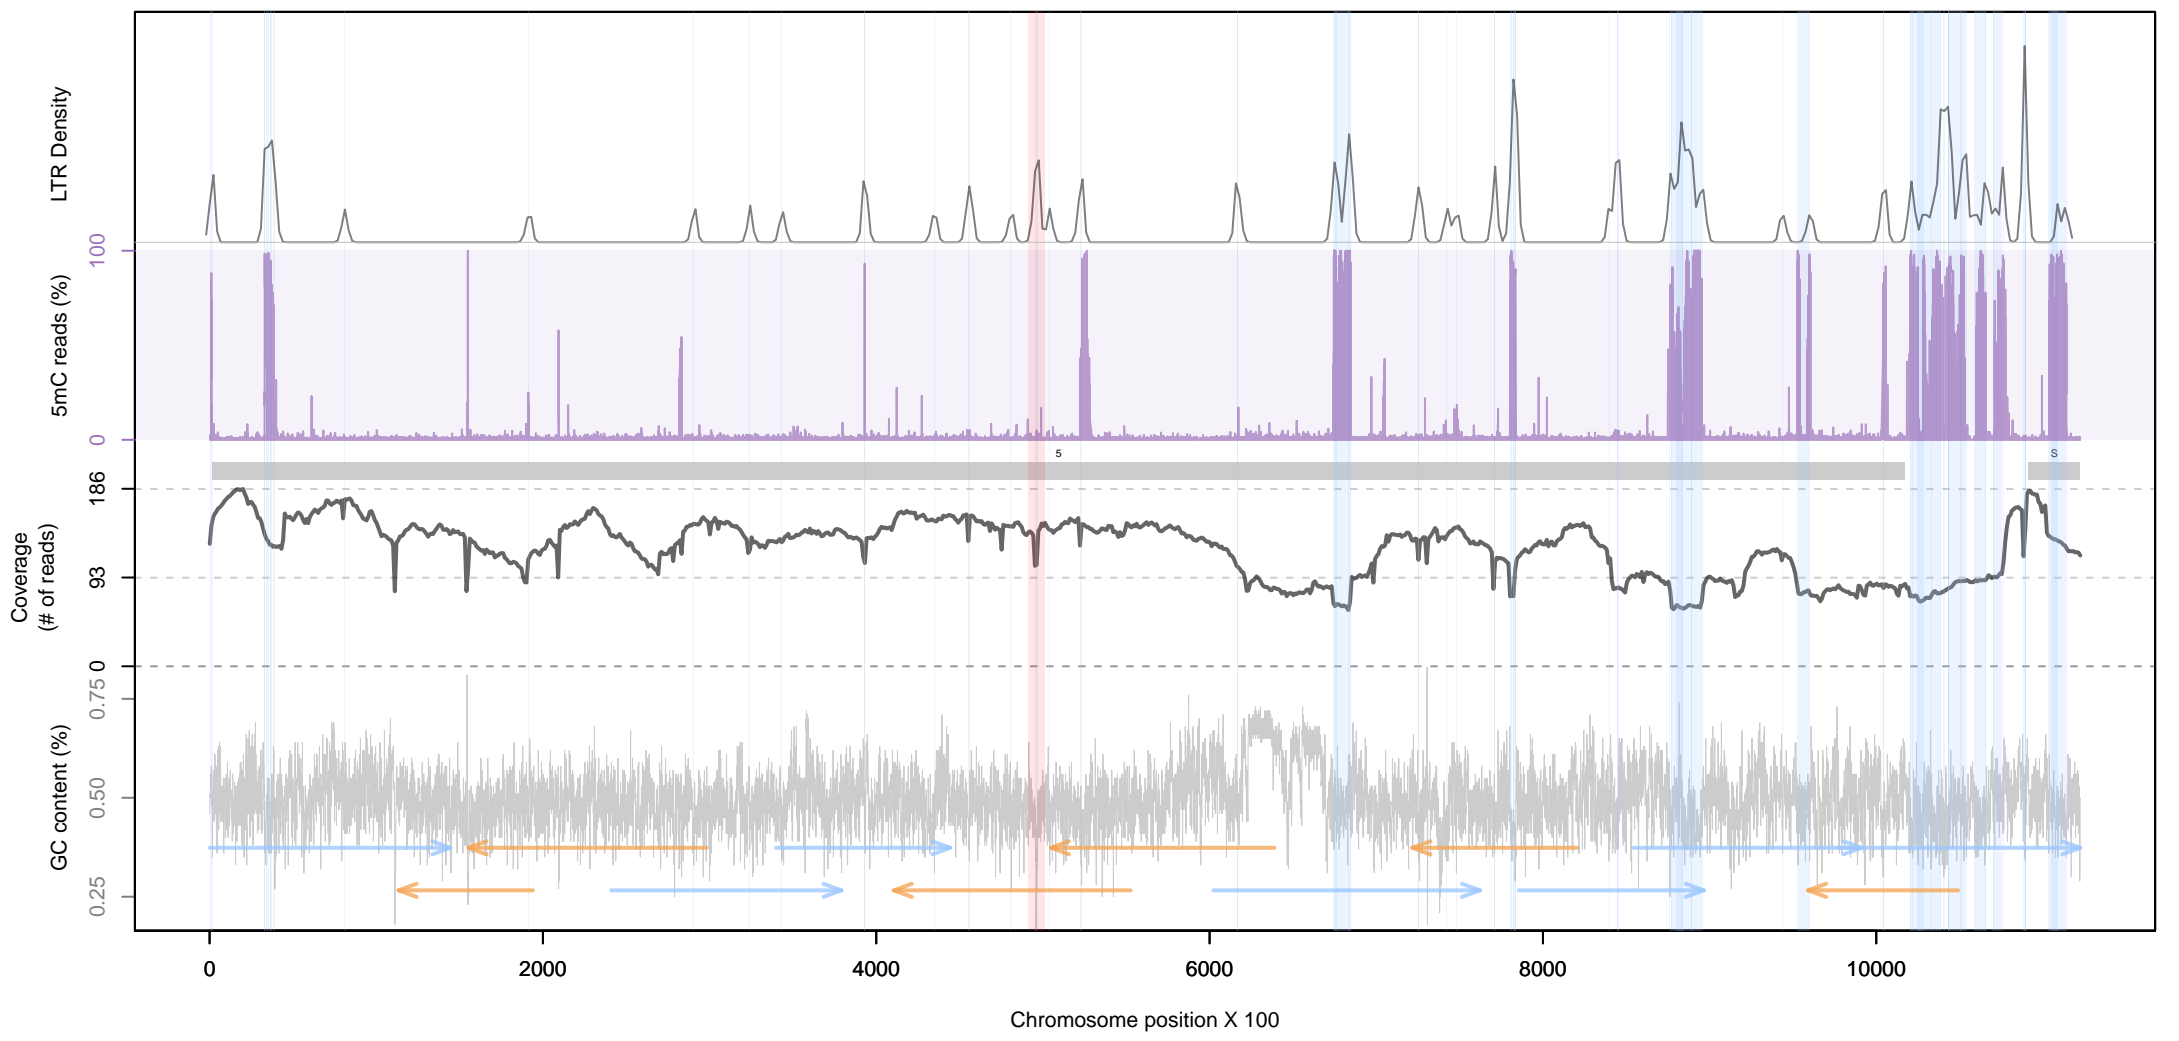

### Chromosome 9

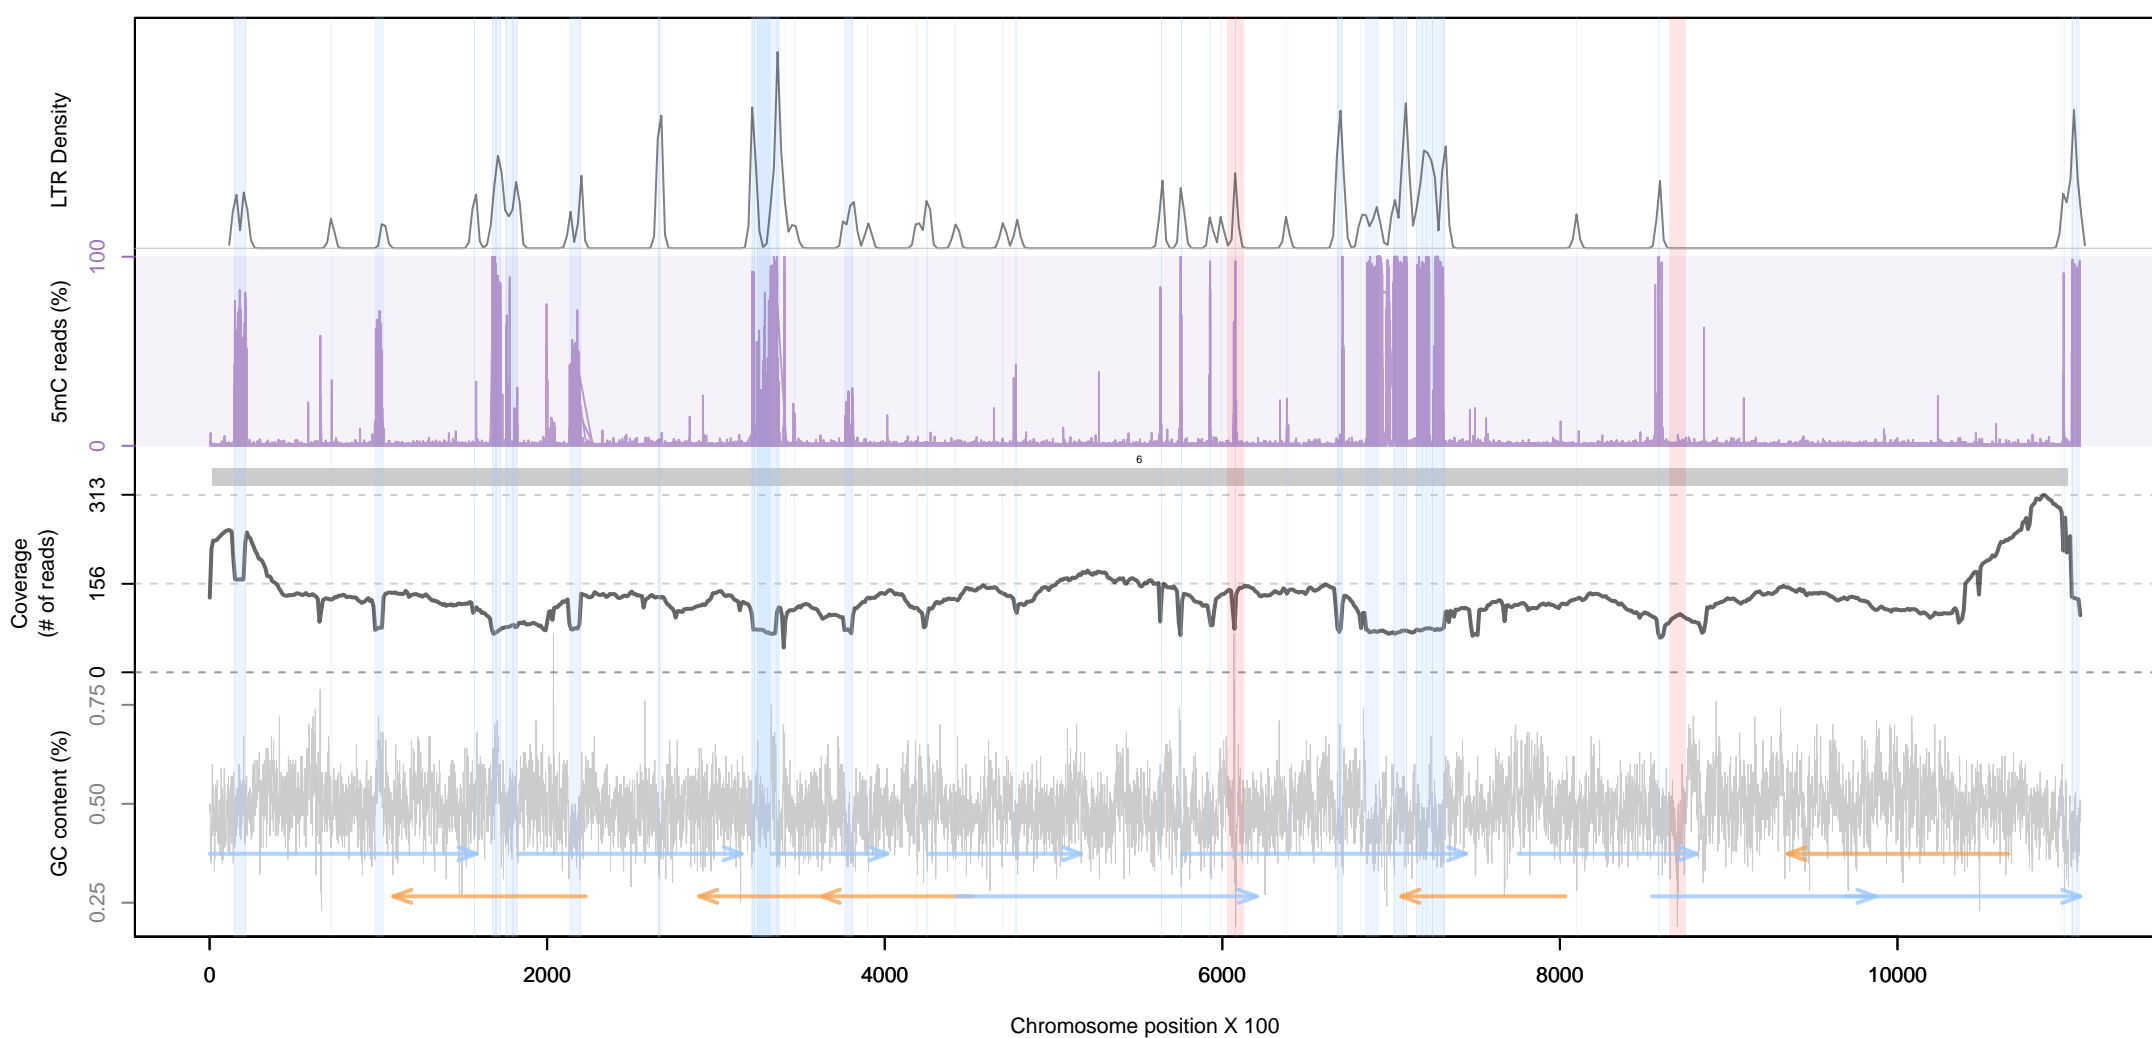

### Chromosome 10

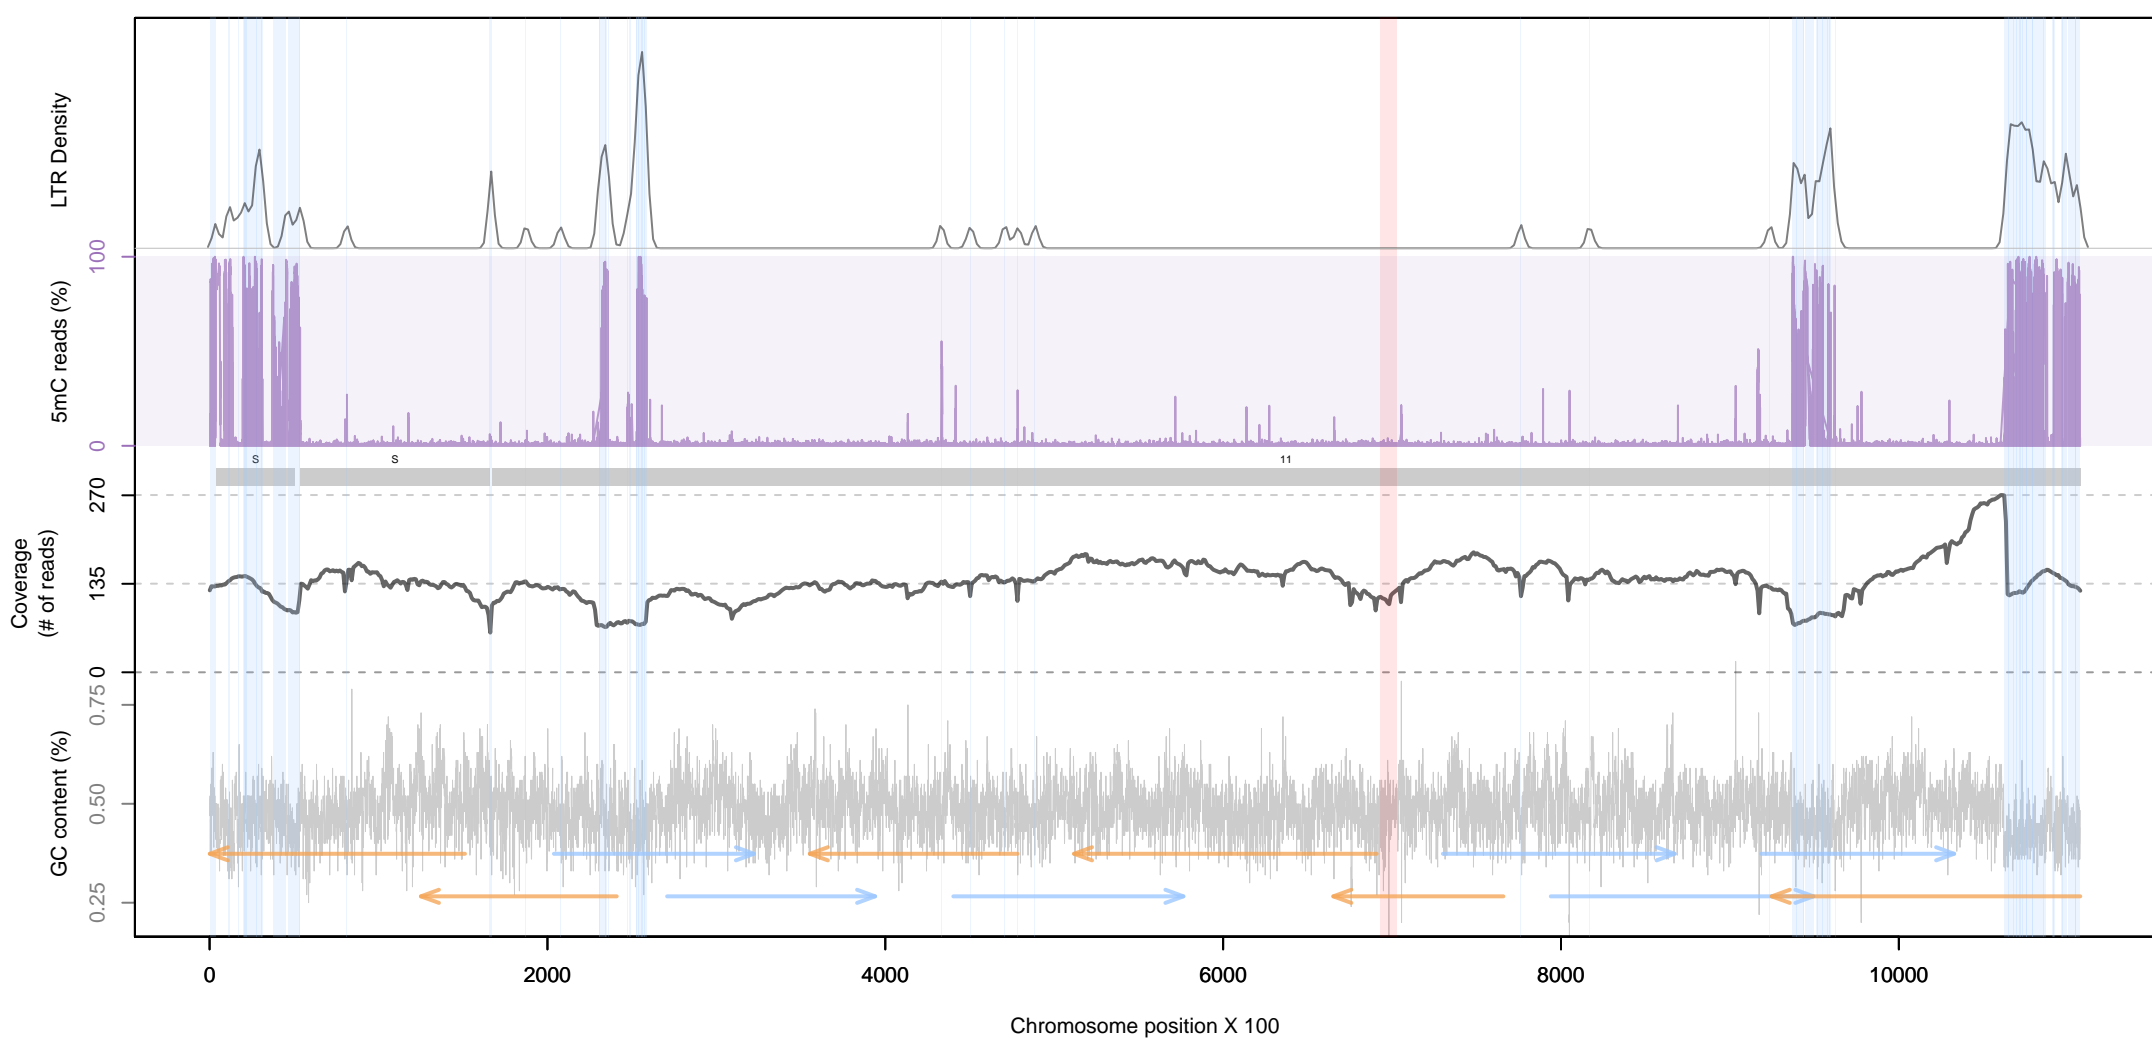

### Chromosome 11

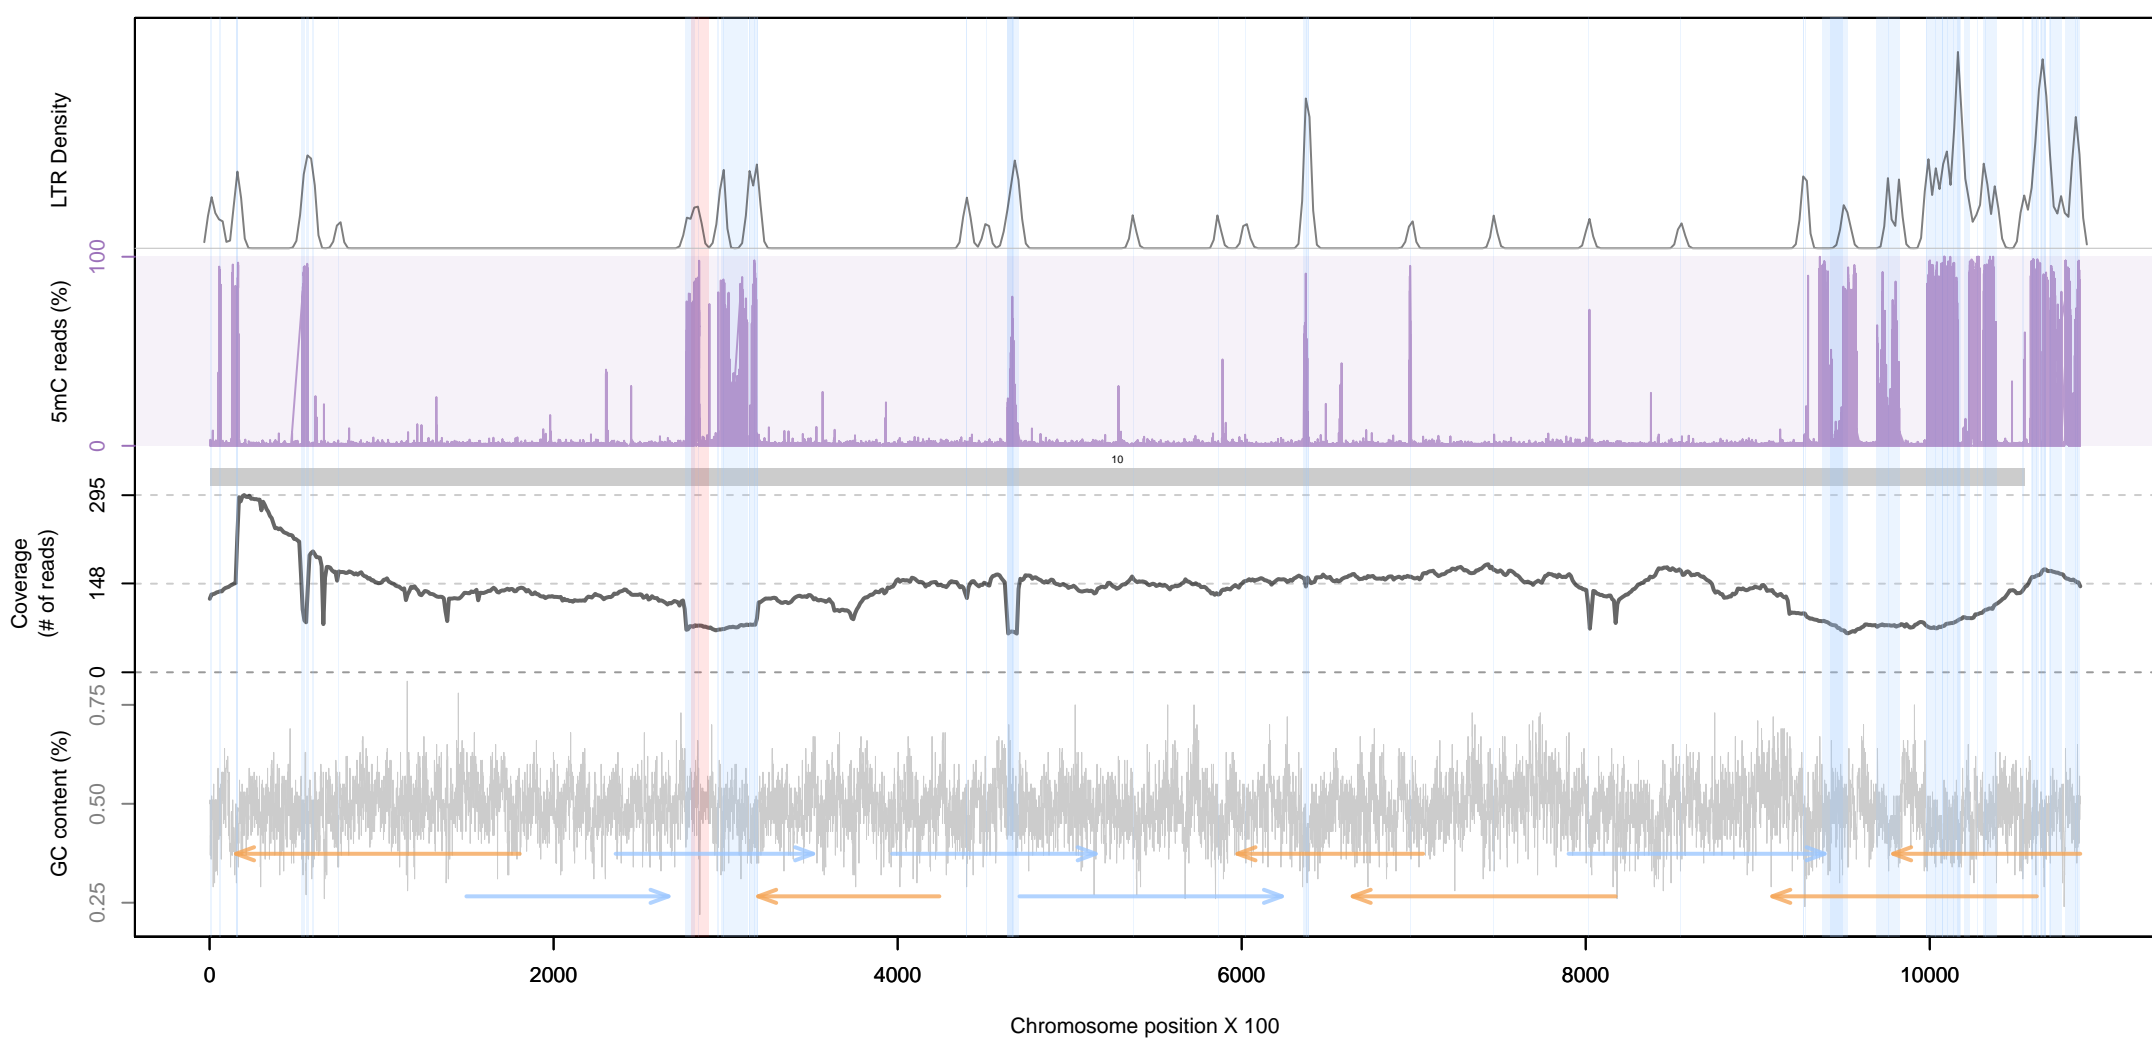

### Chromosome 12

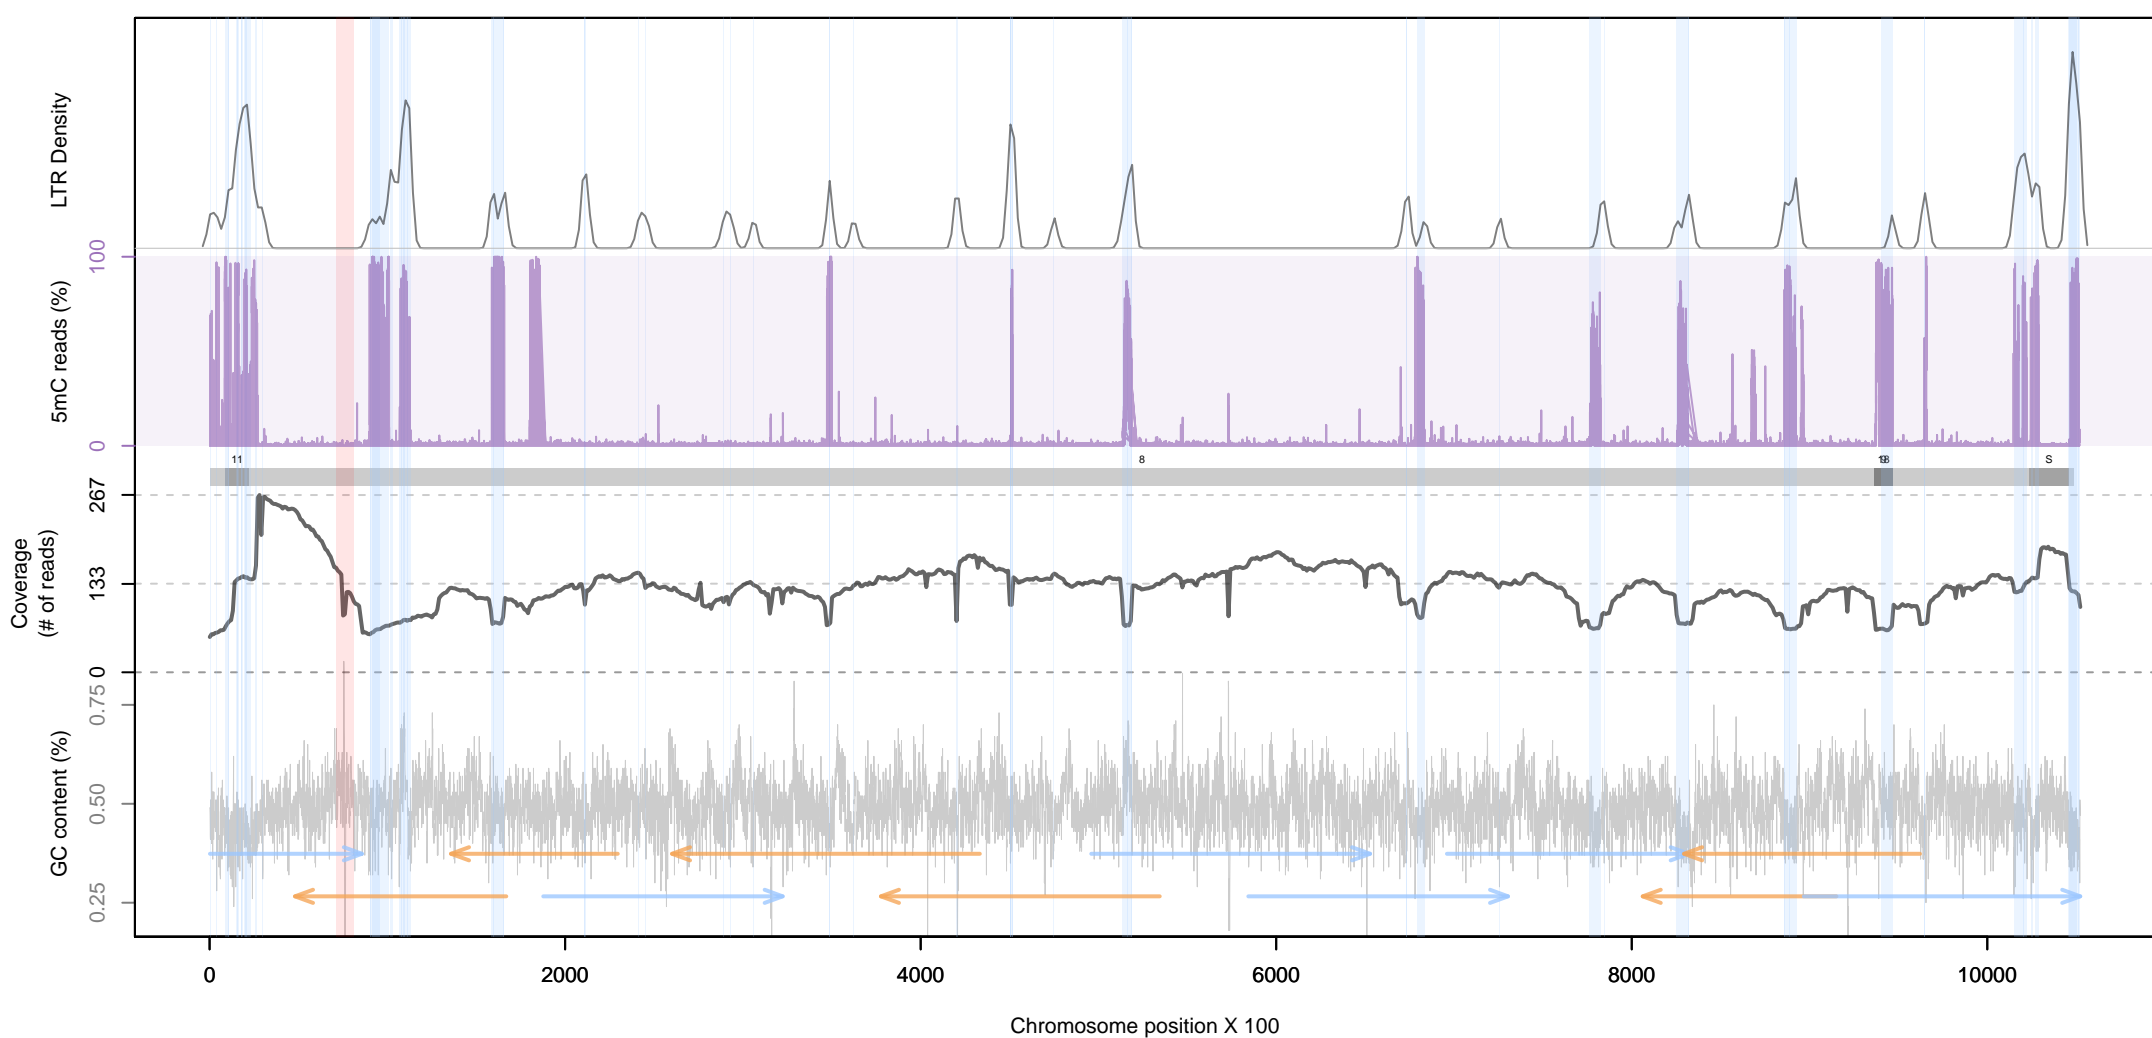

### Chromosome 13

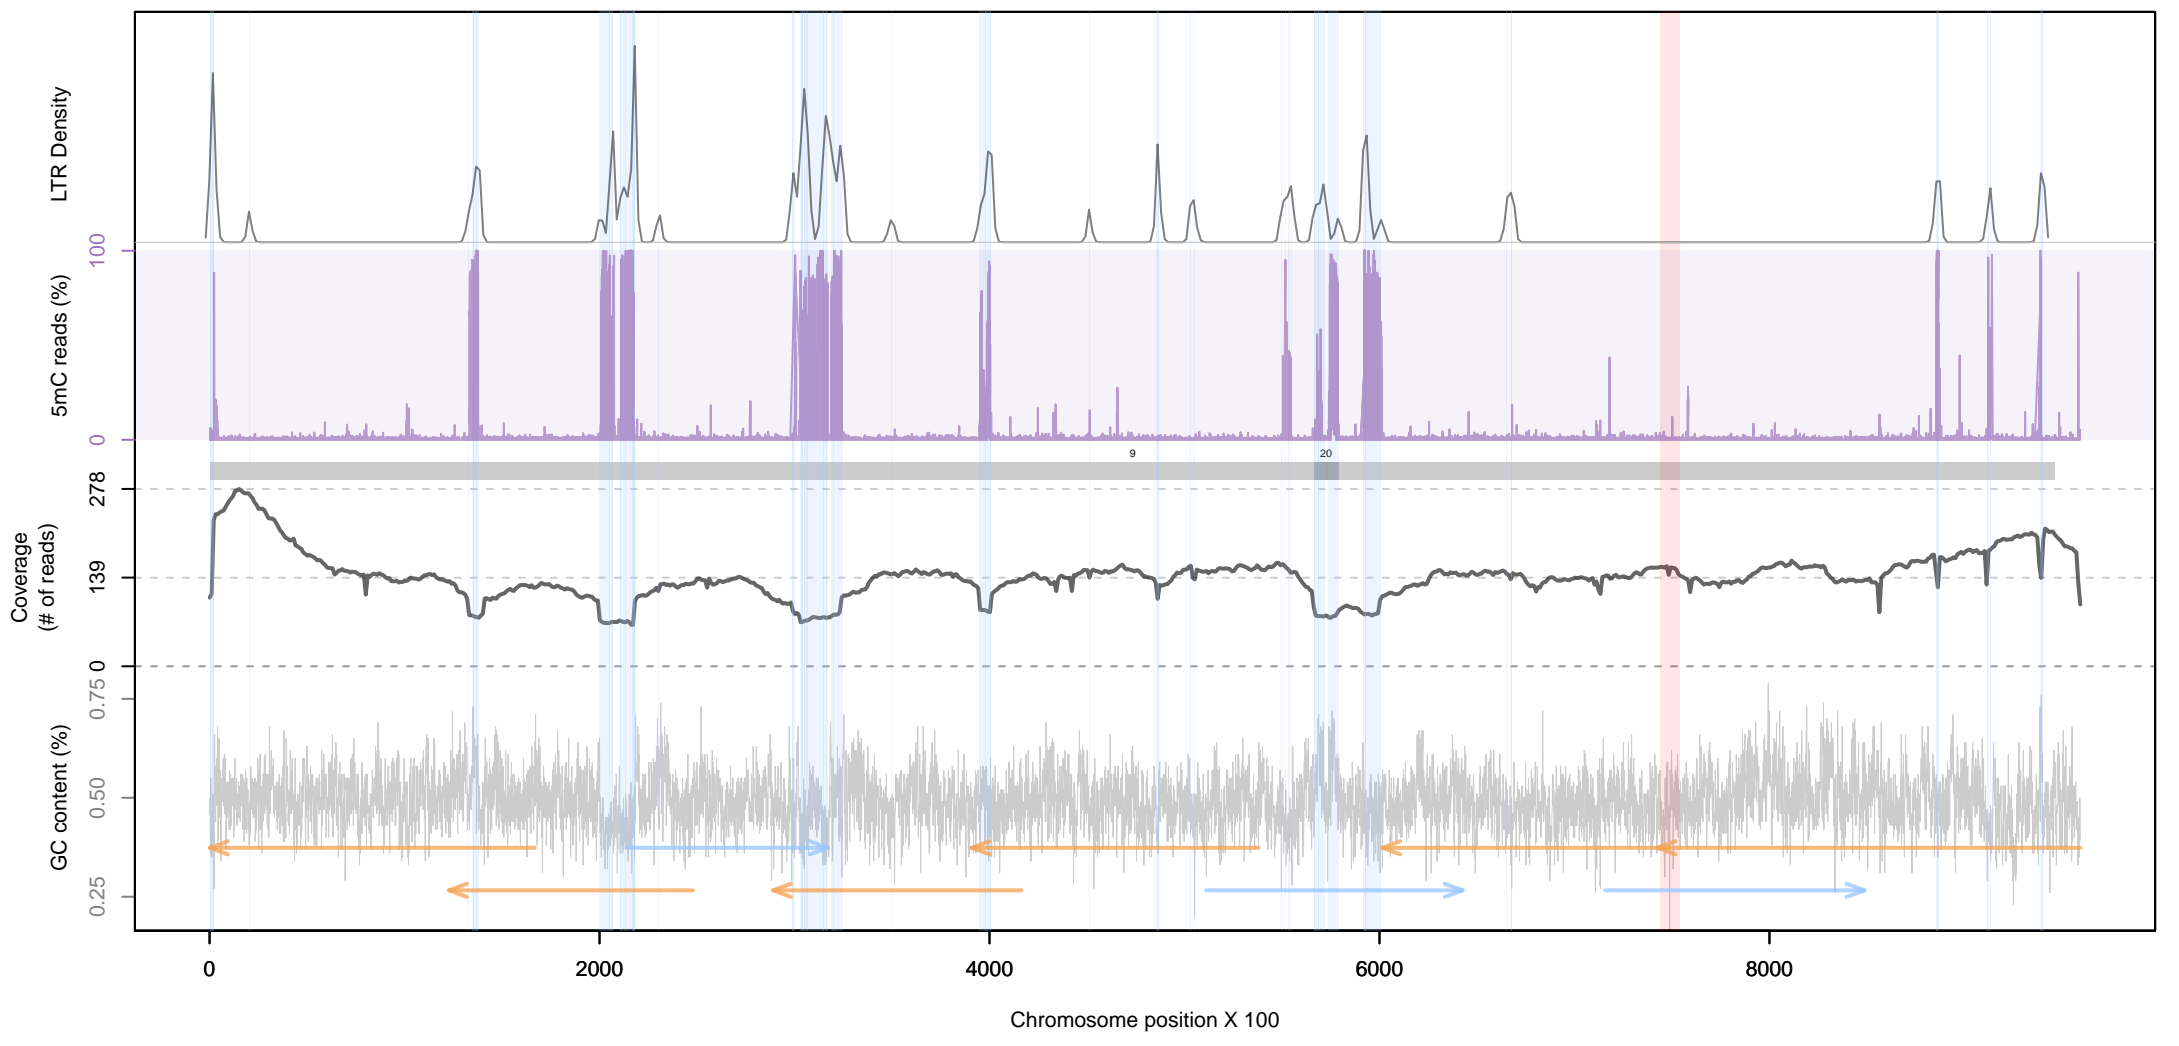

### Chromosome 14

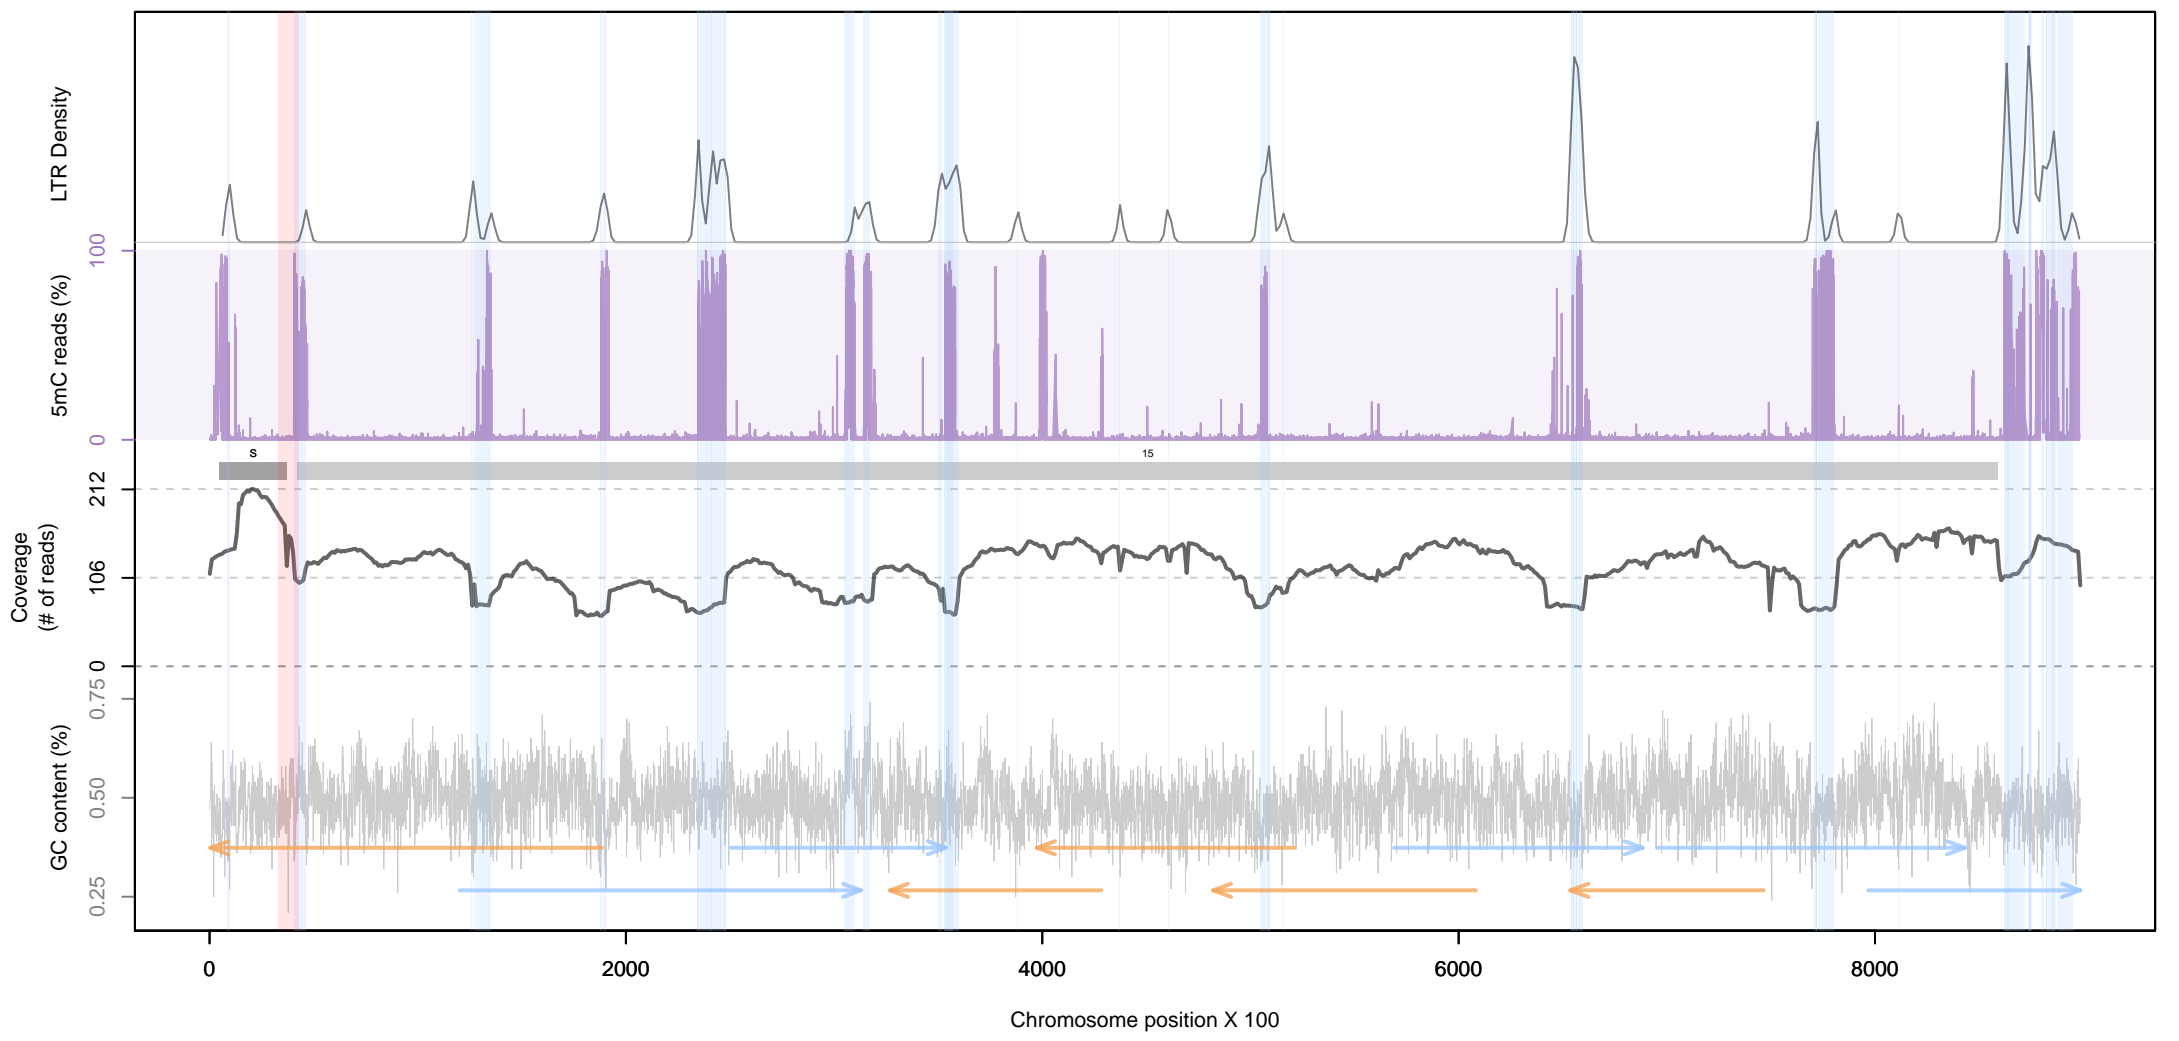

### Chromosome 15

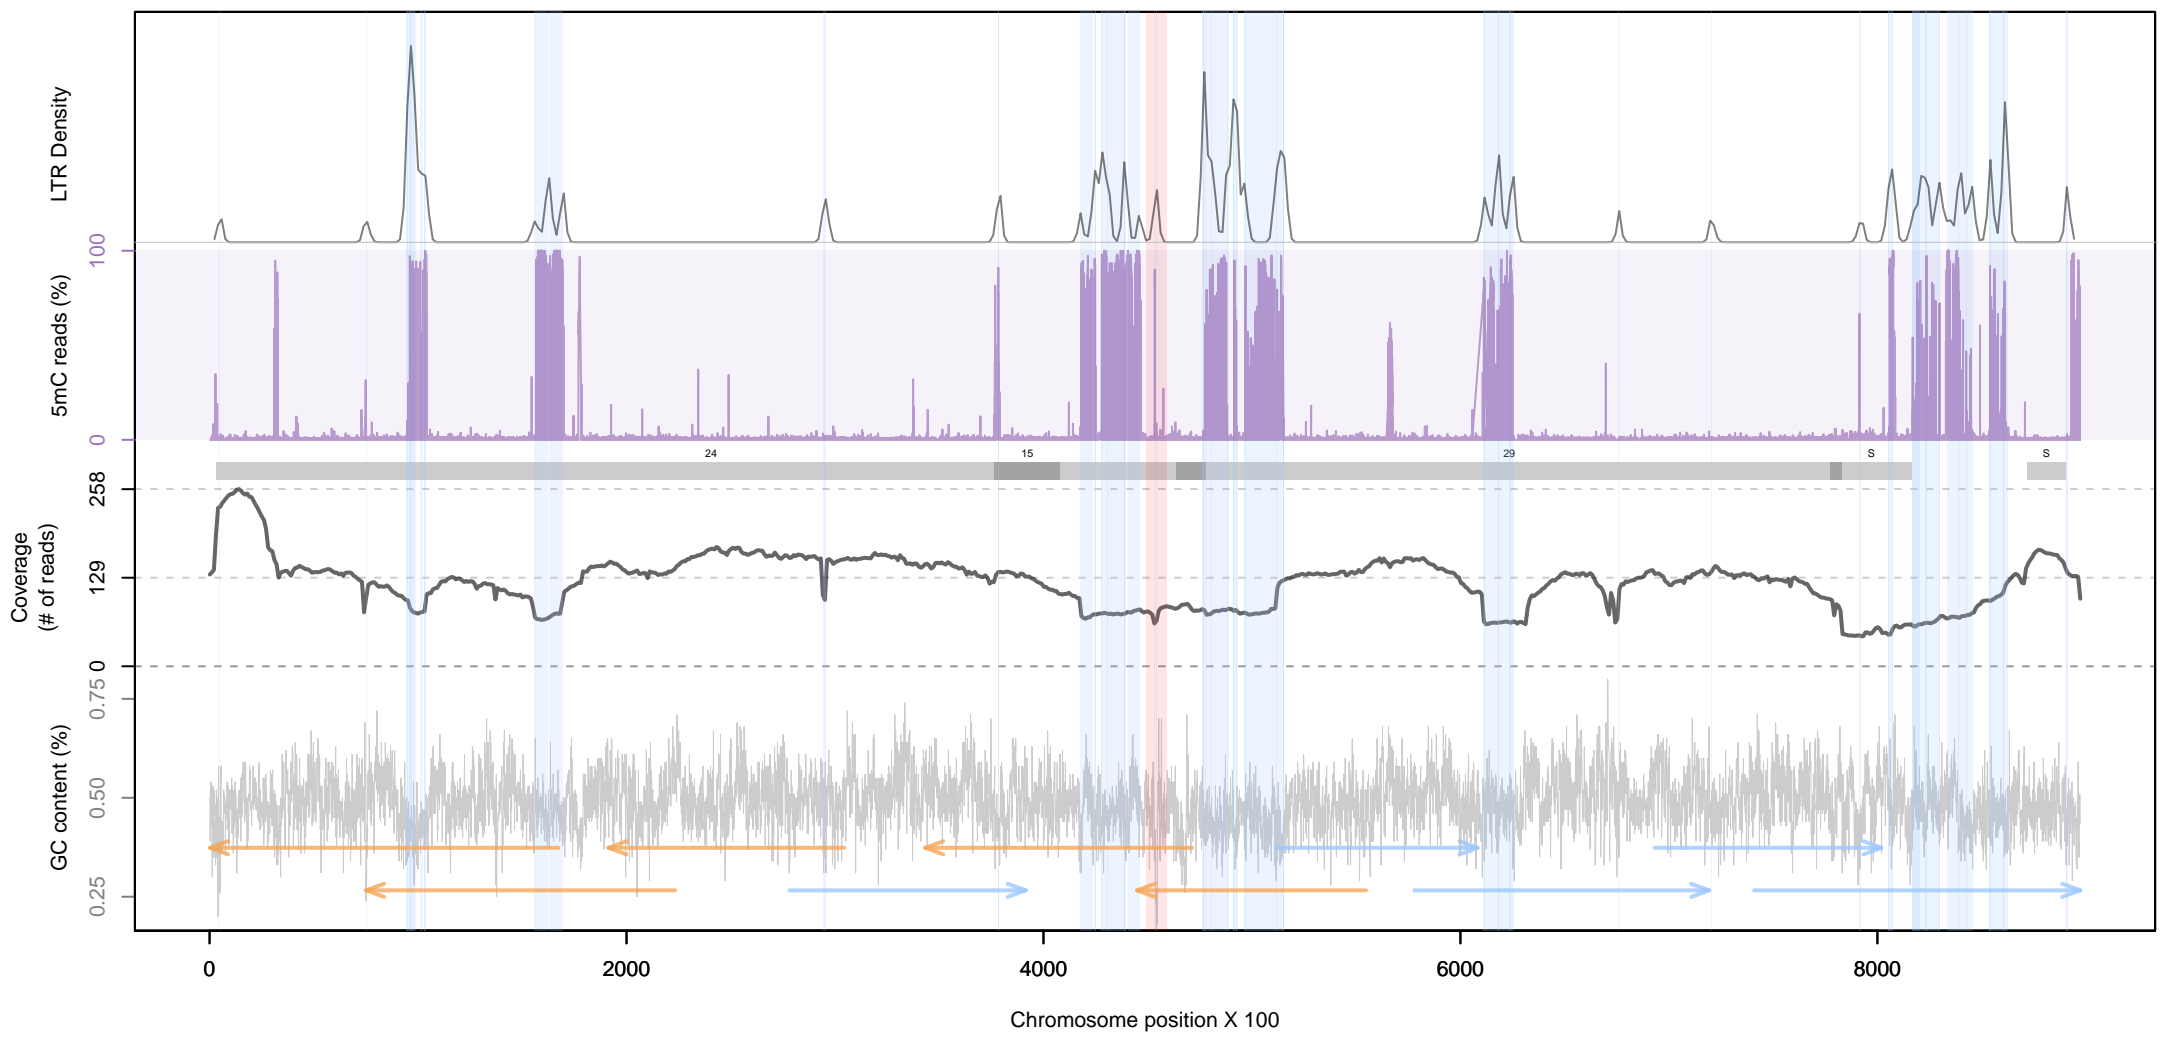

### Chromosome 16

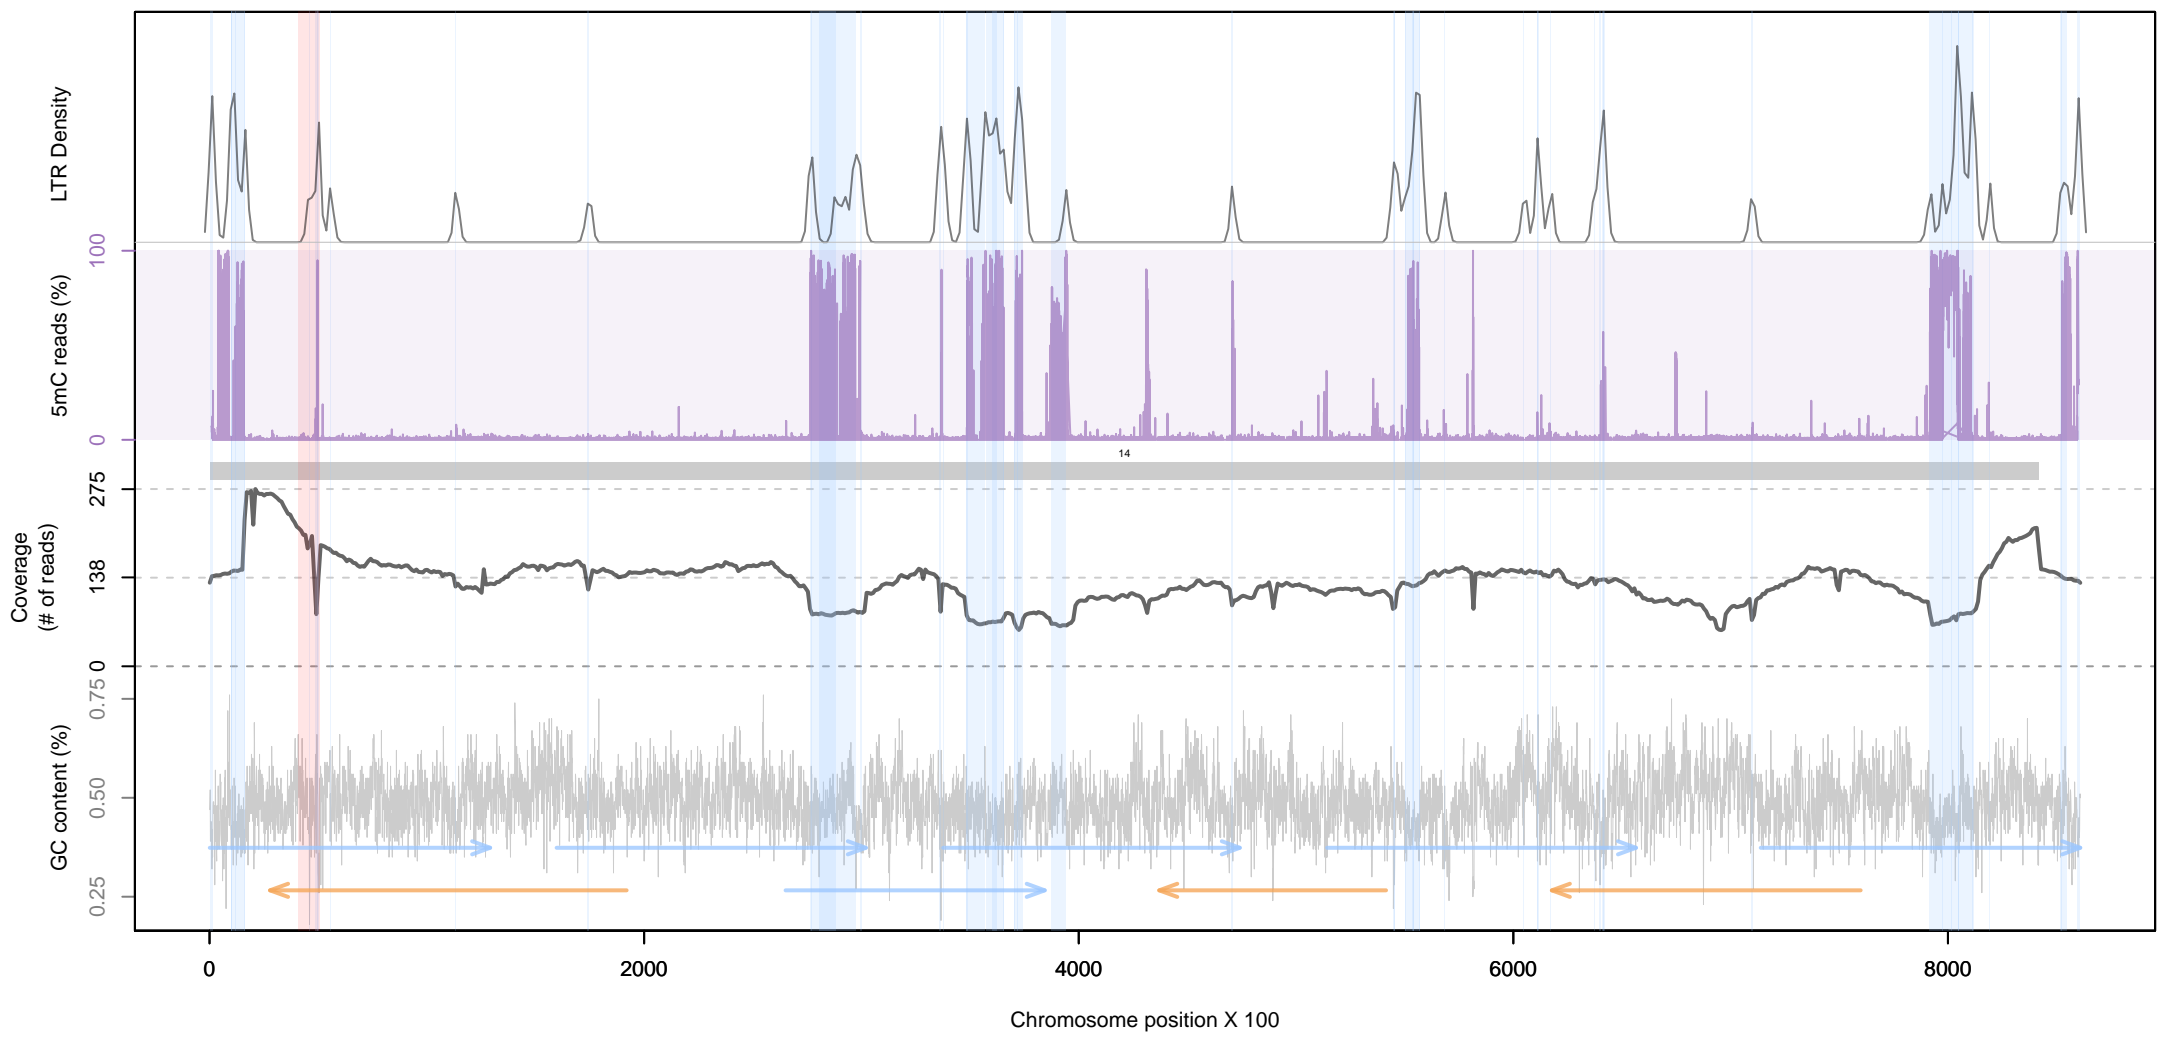

### Chromosome 17

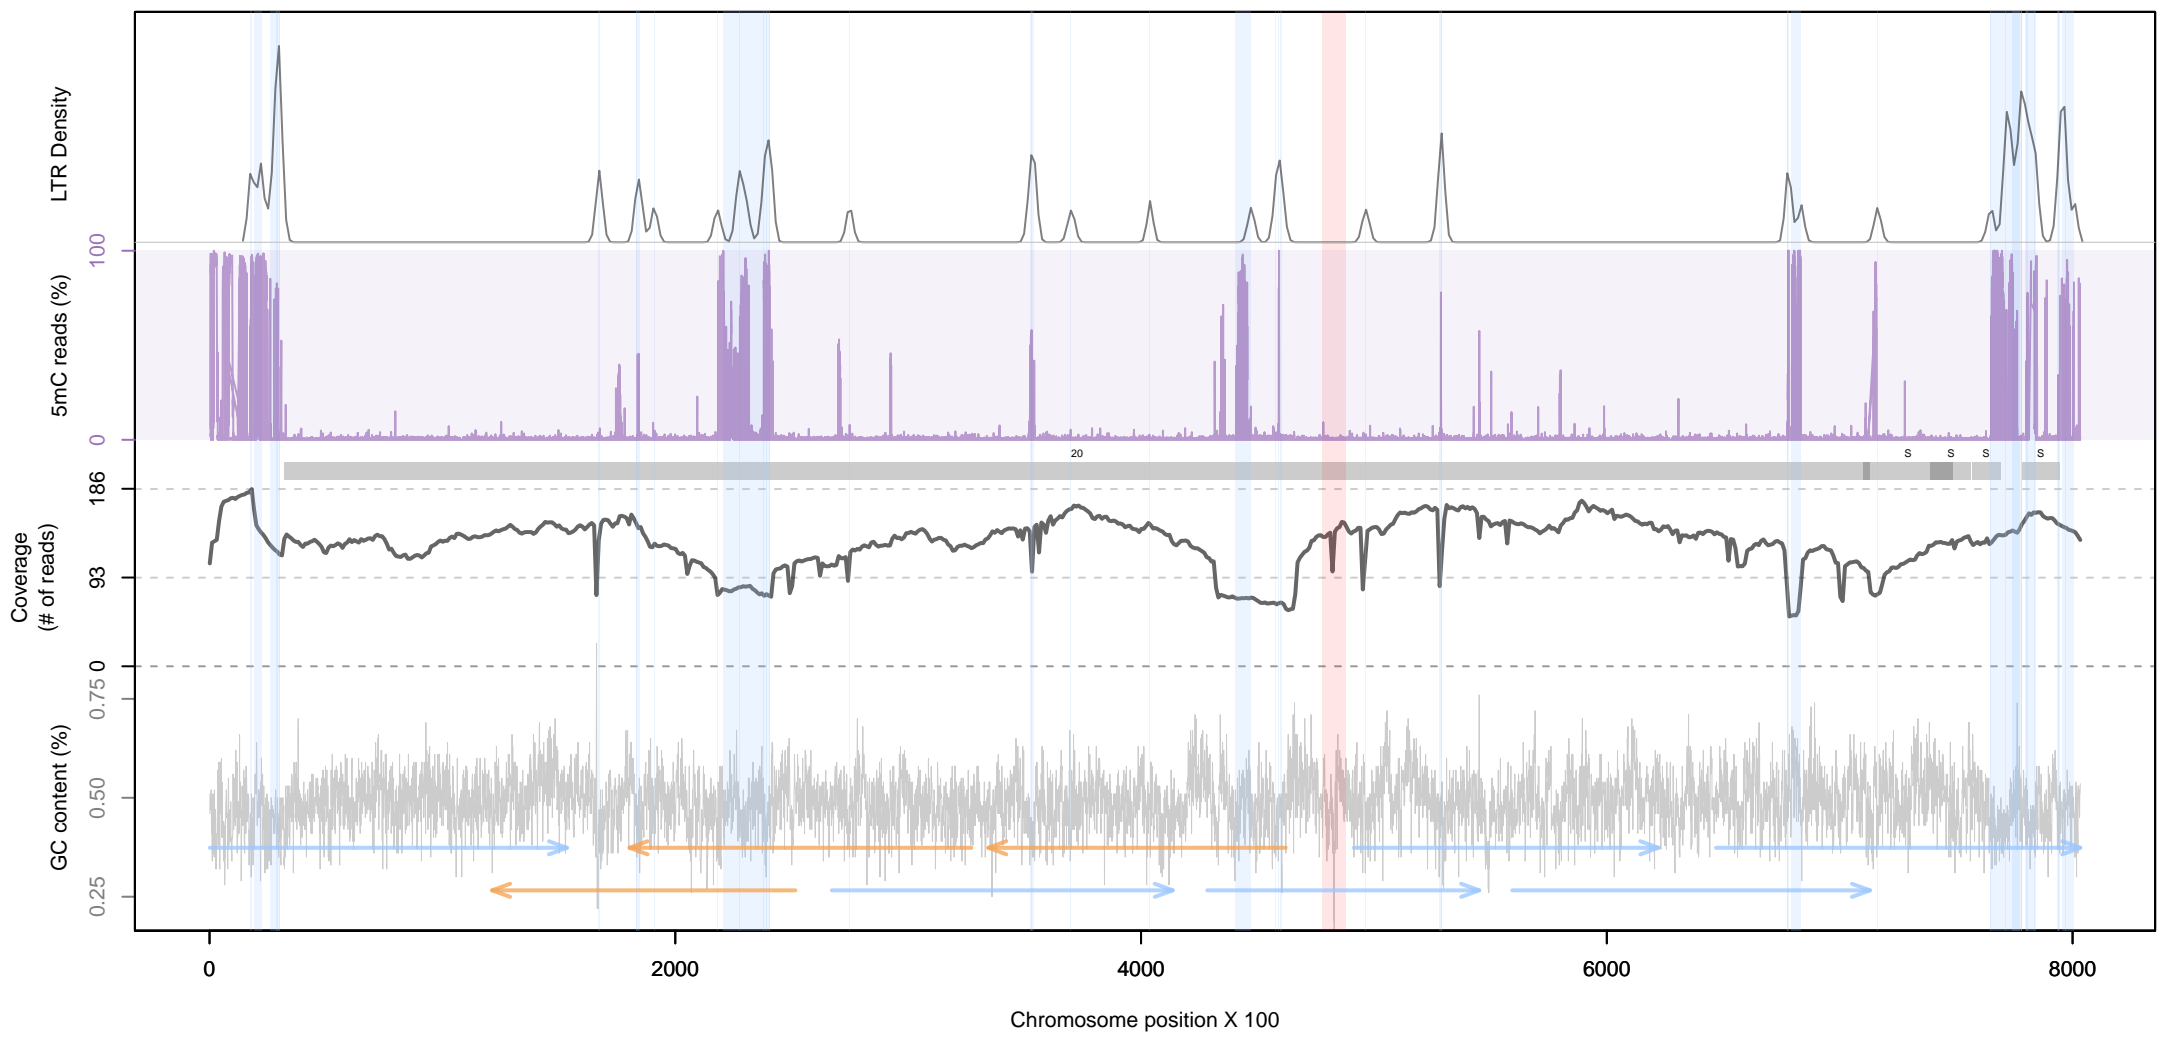

### Chromosome 18

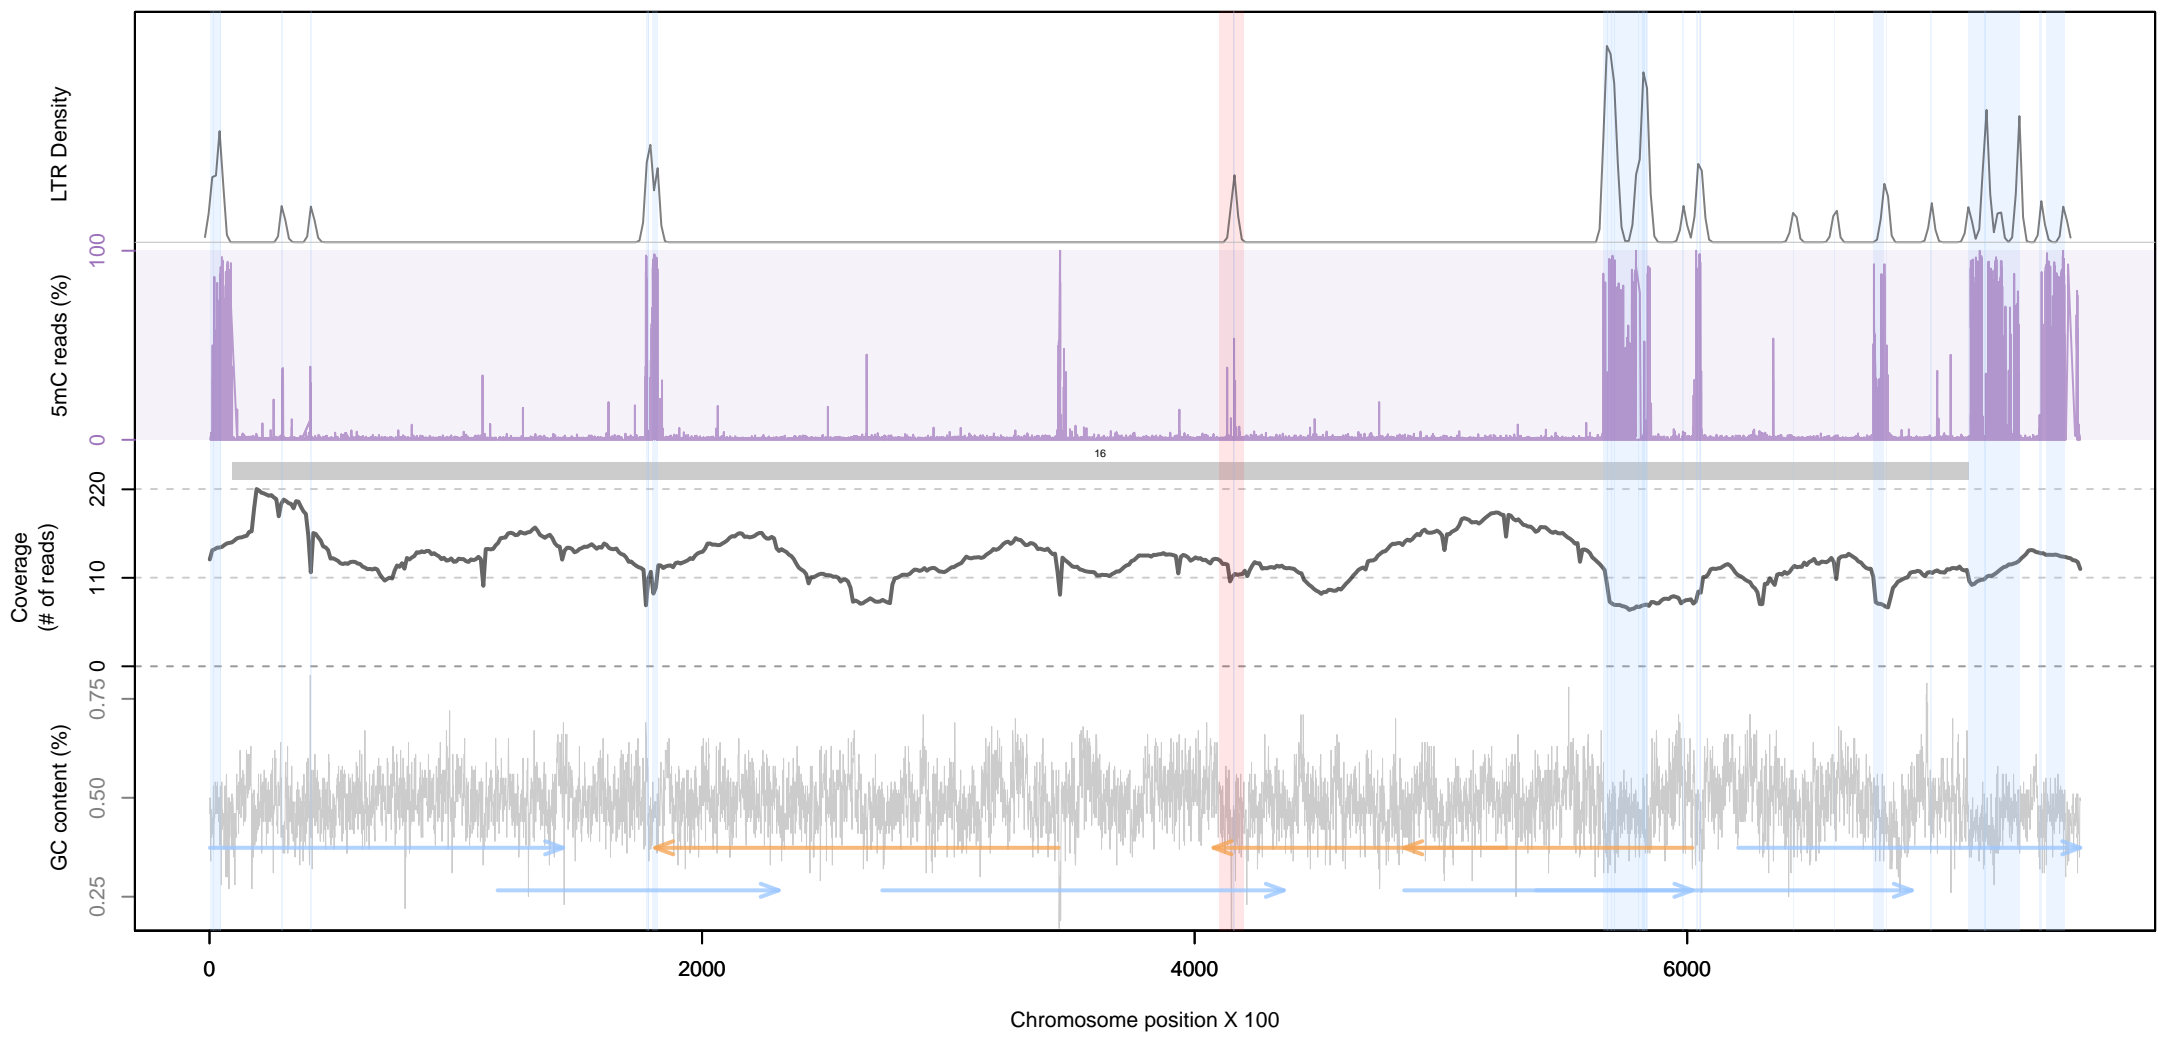

### Chromosome 19

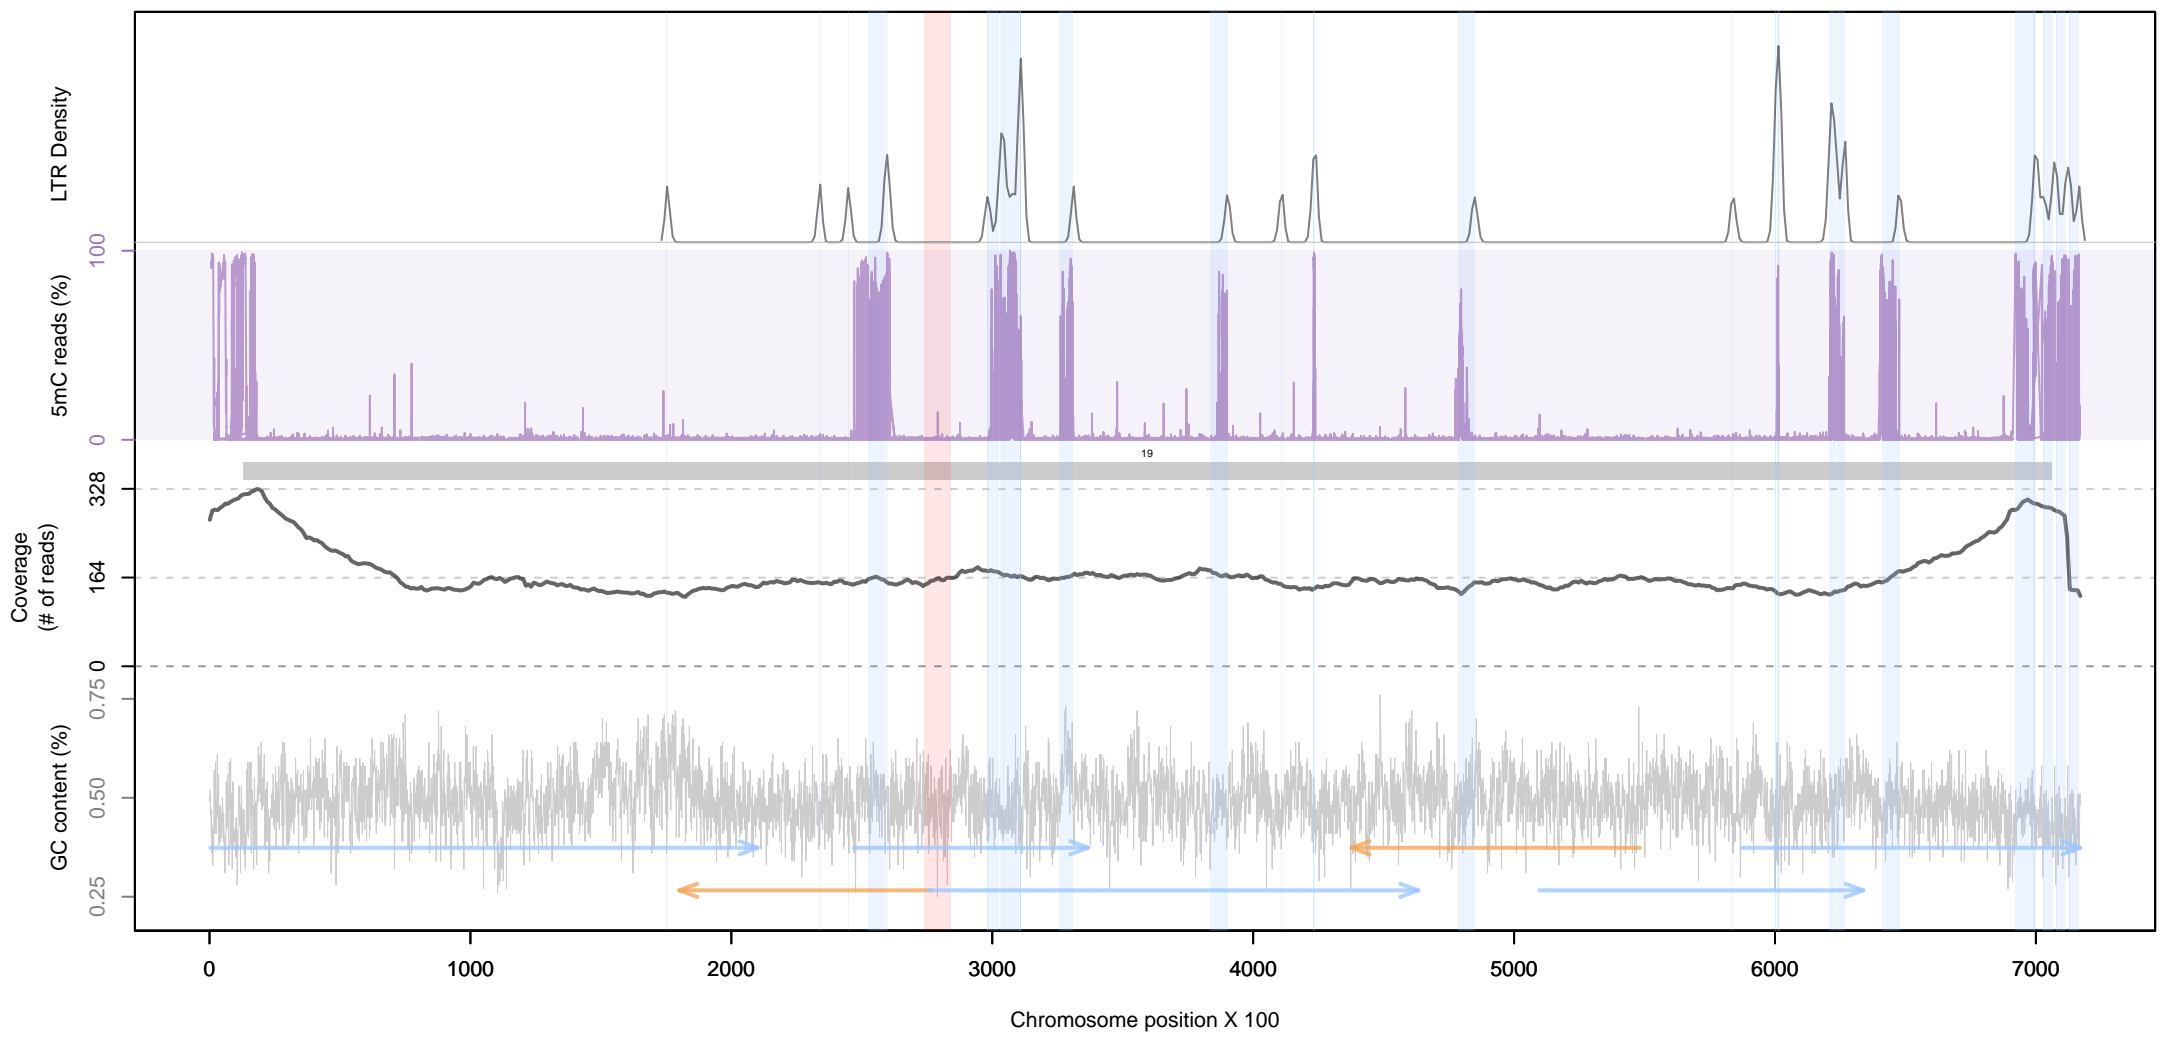

### Chromosome 20

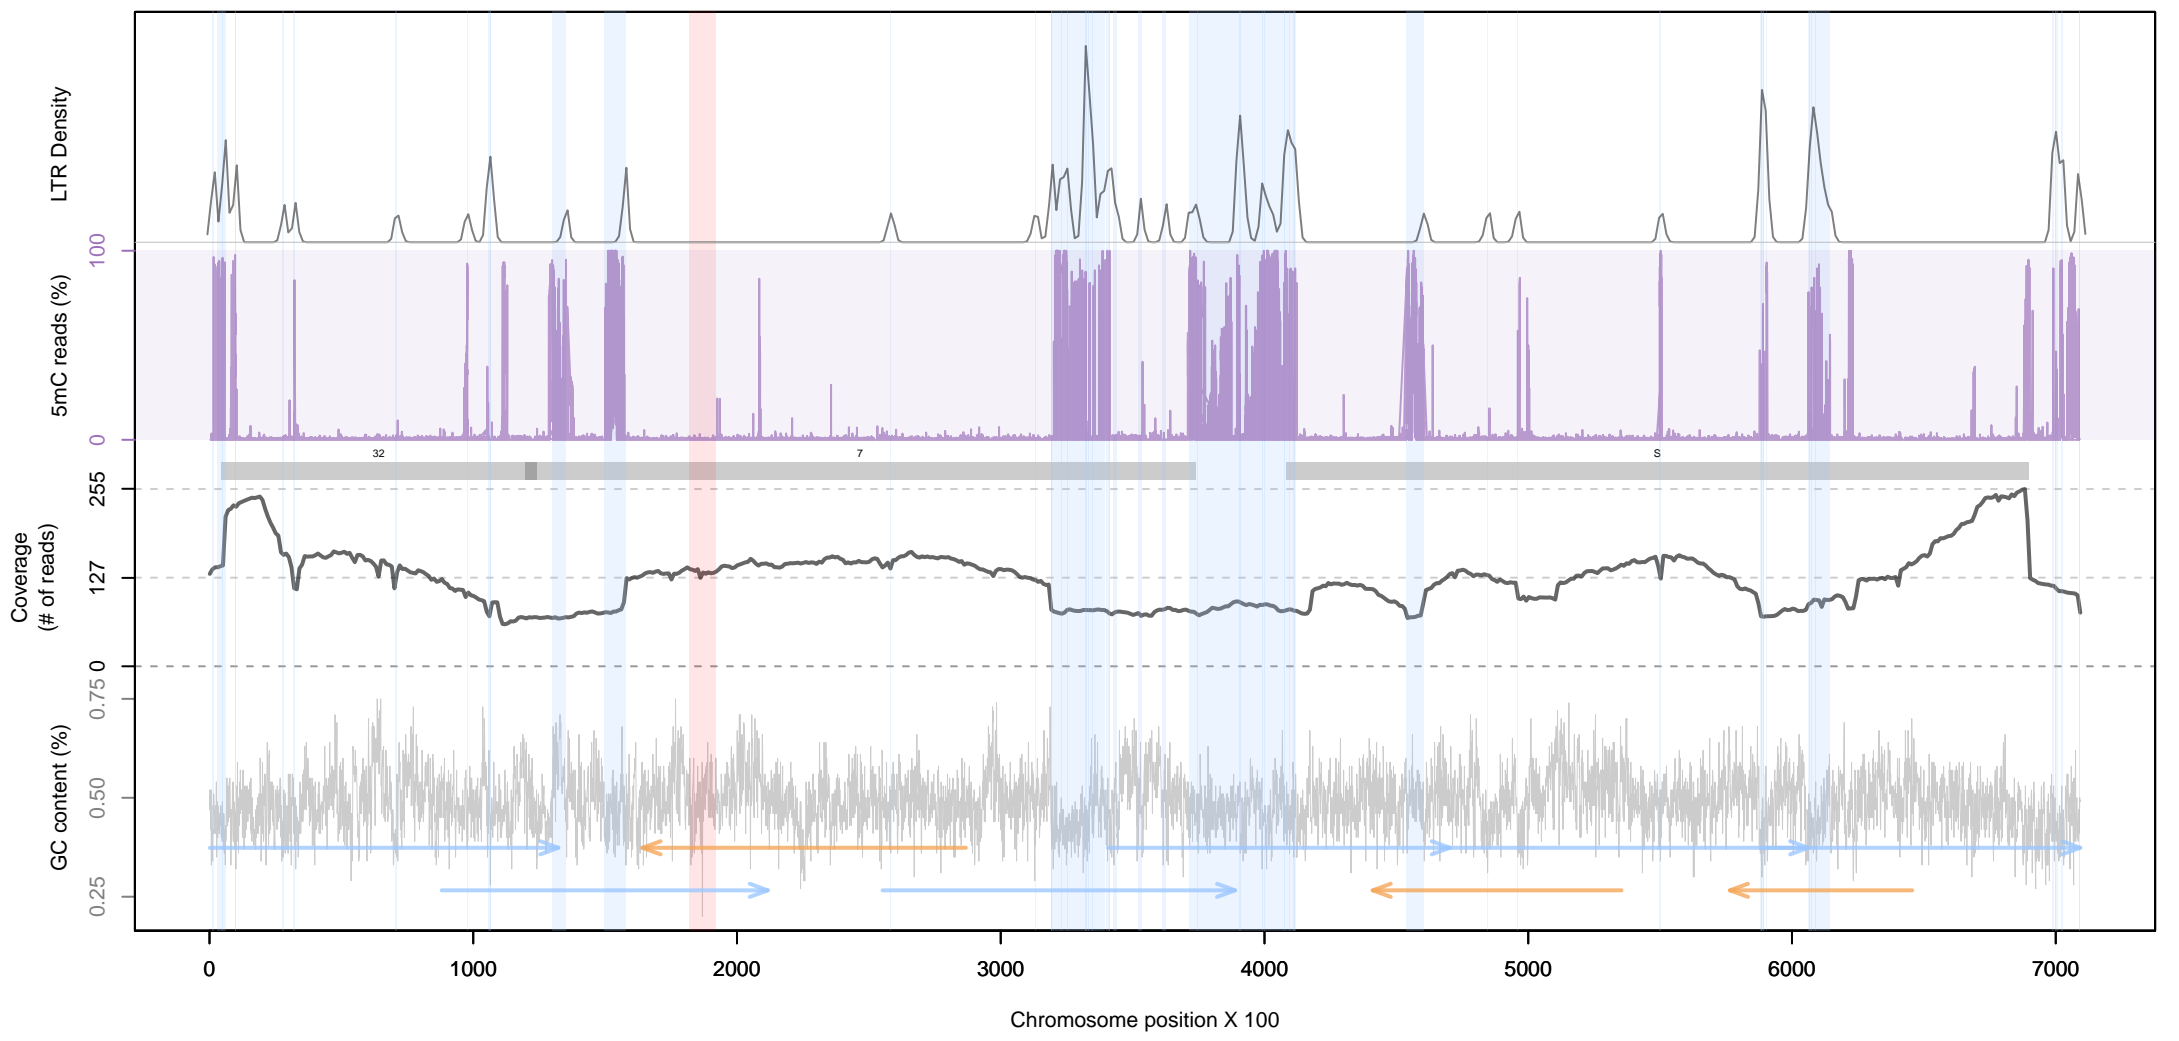

### Chromosome 21

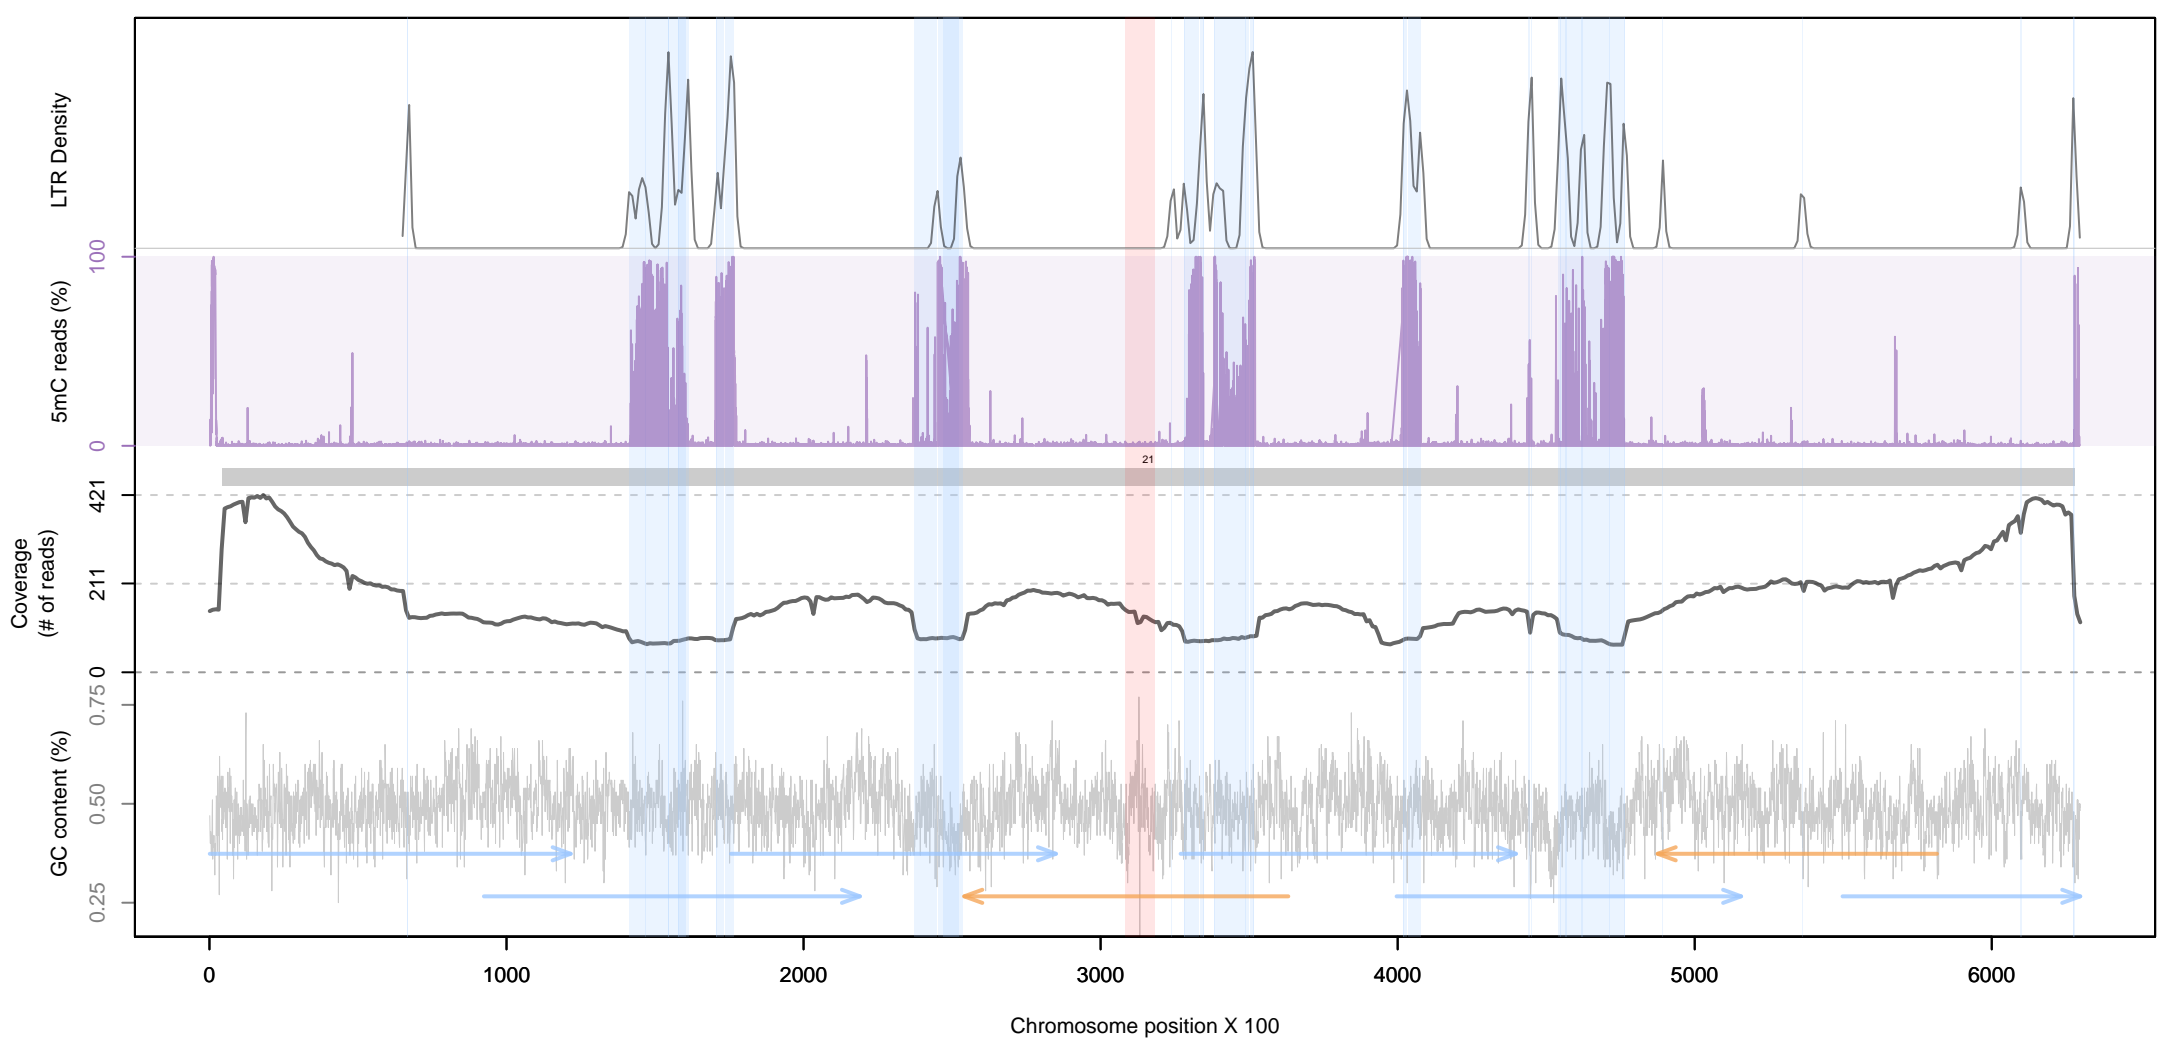

### Chromosome 22

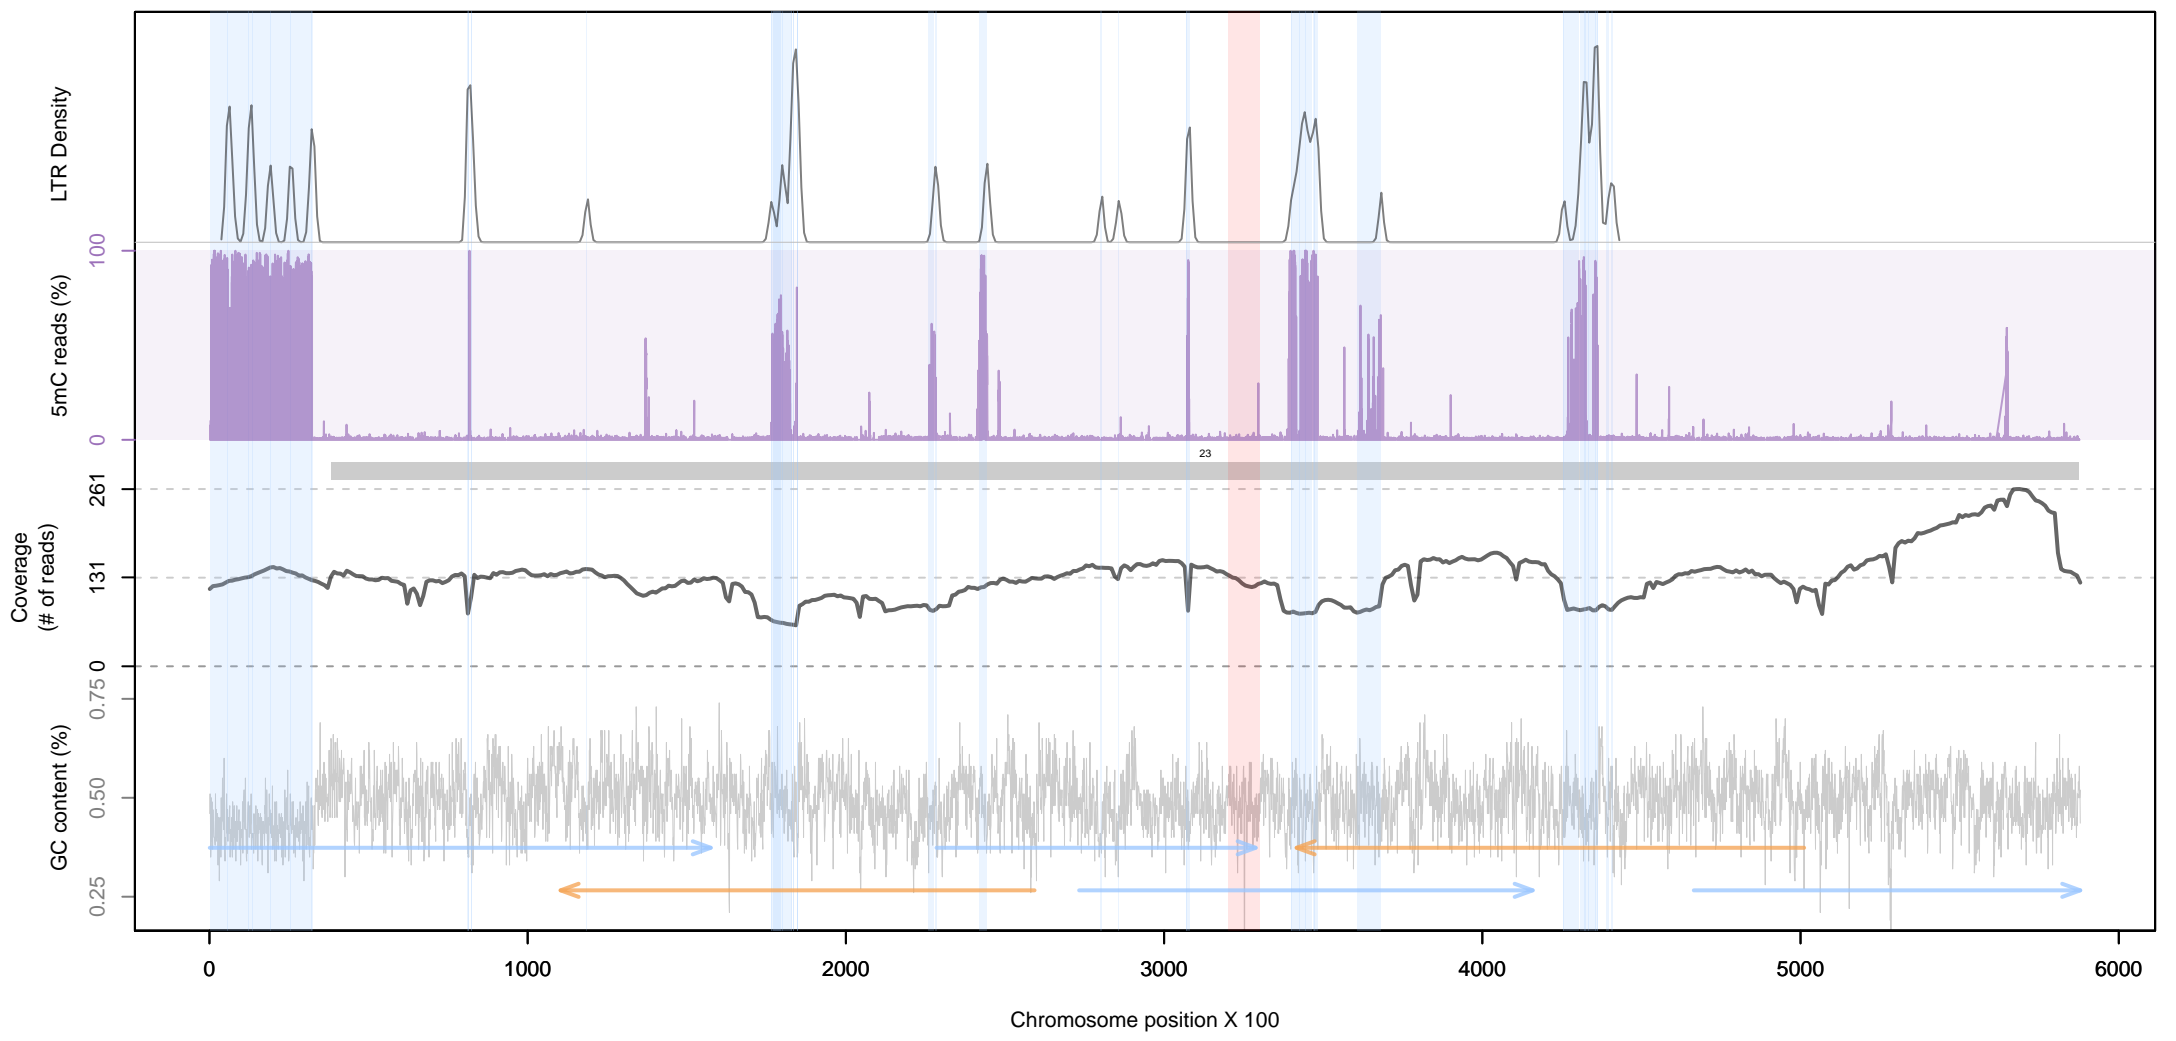

### Chromosome 23

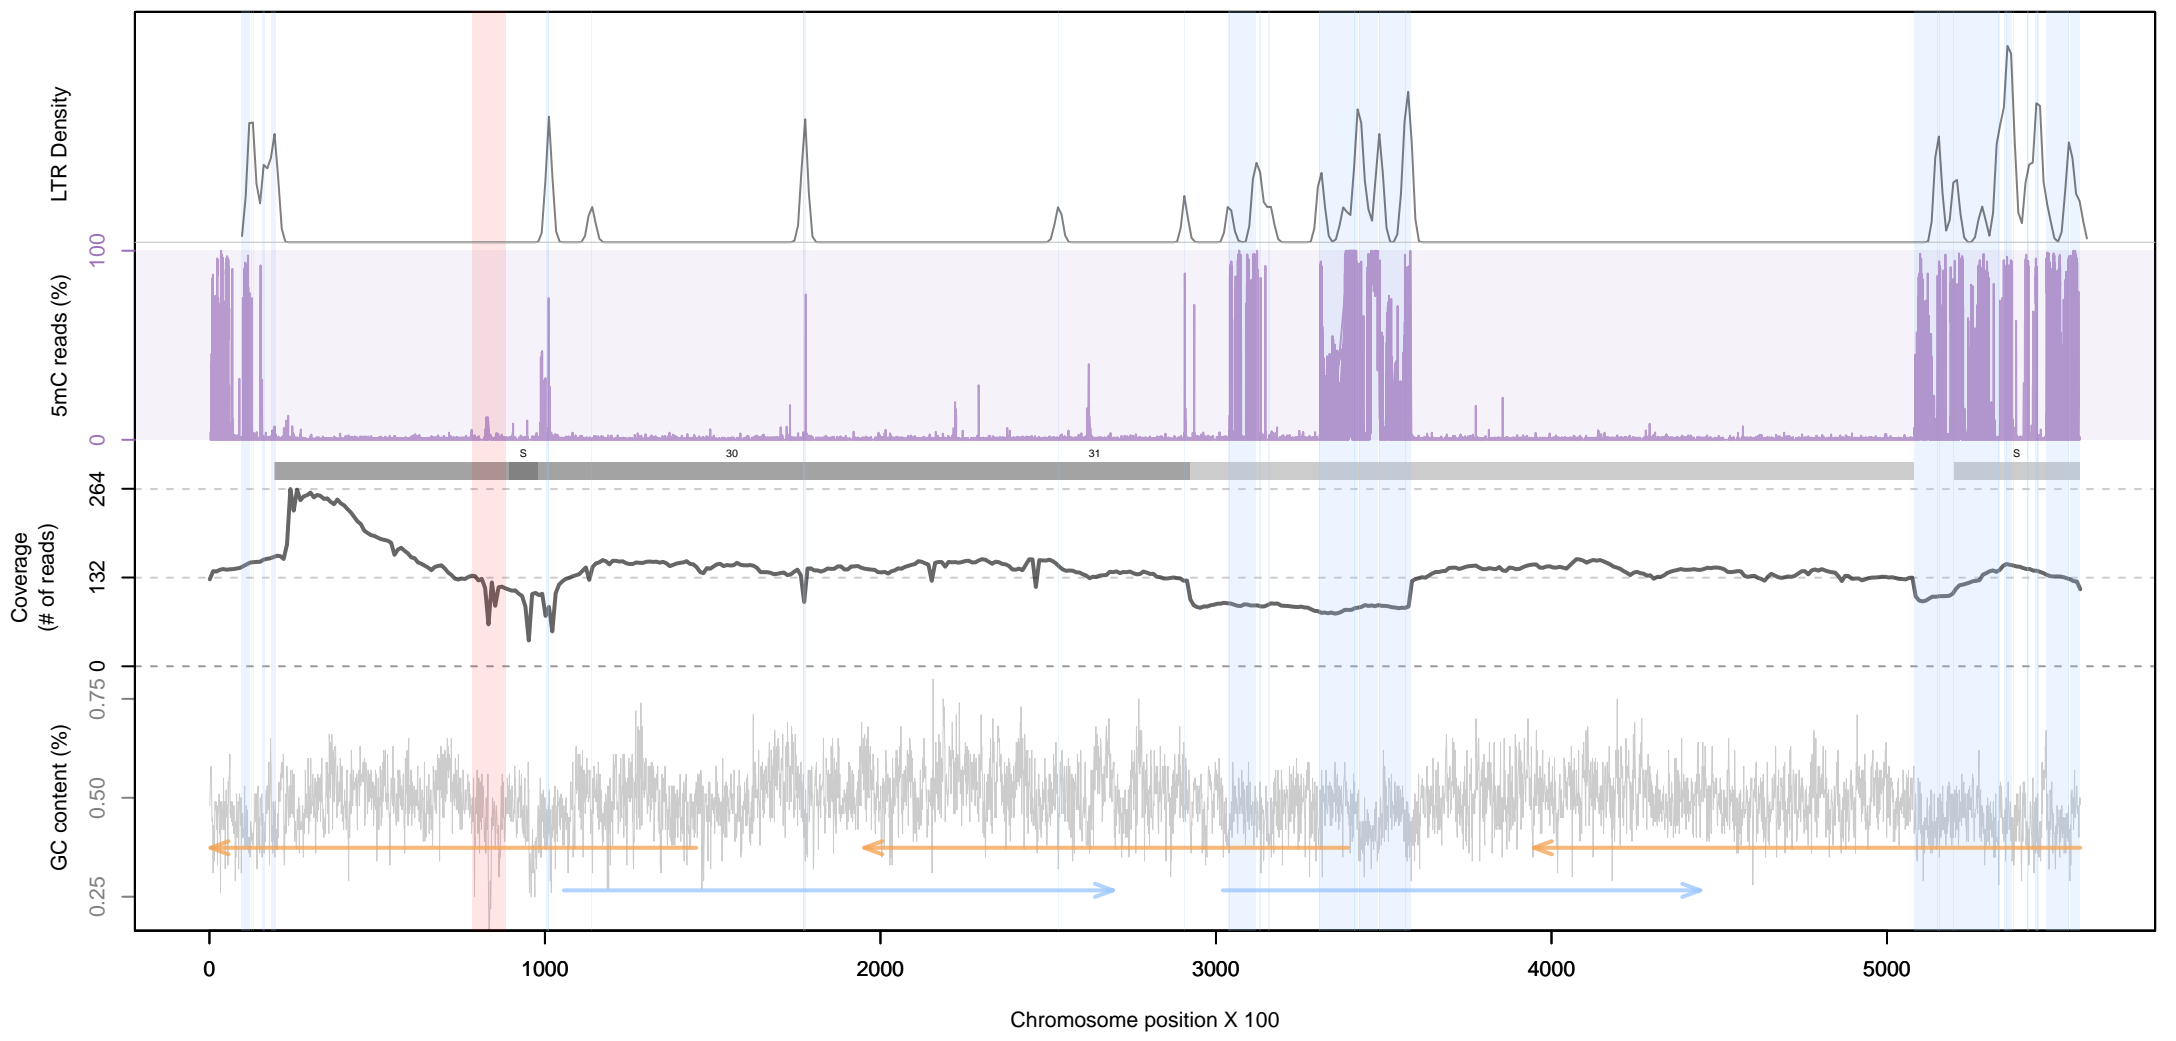

### Chromosome 24

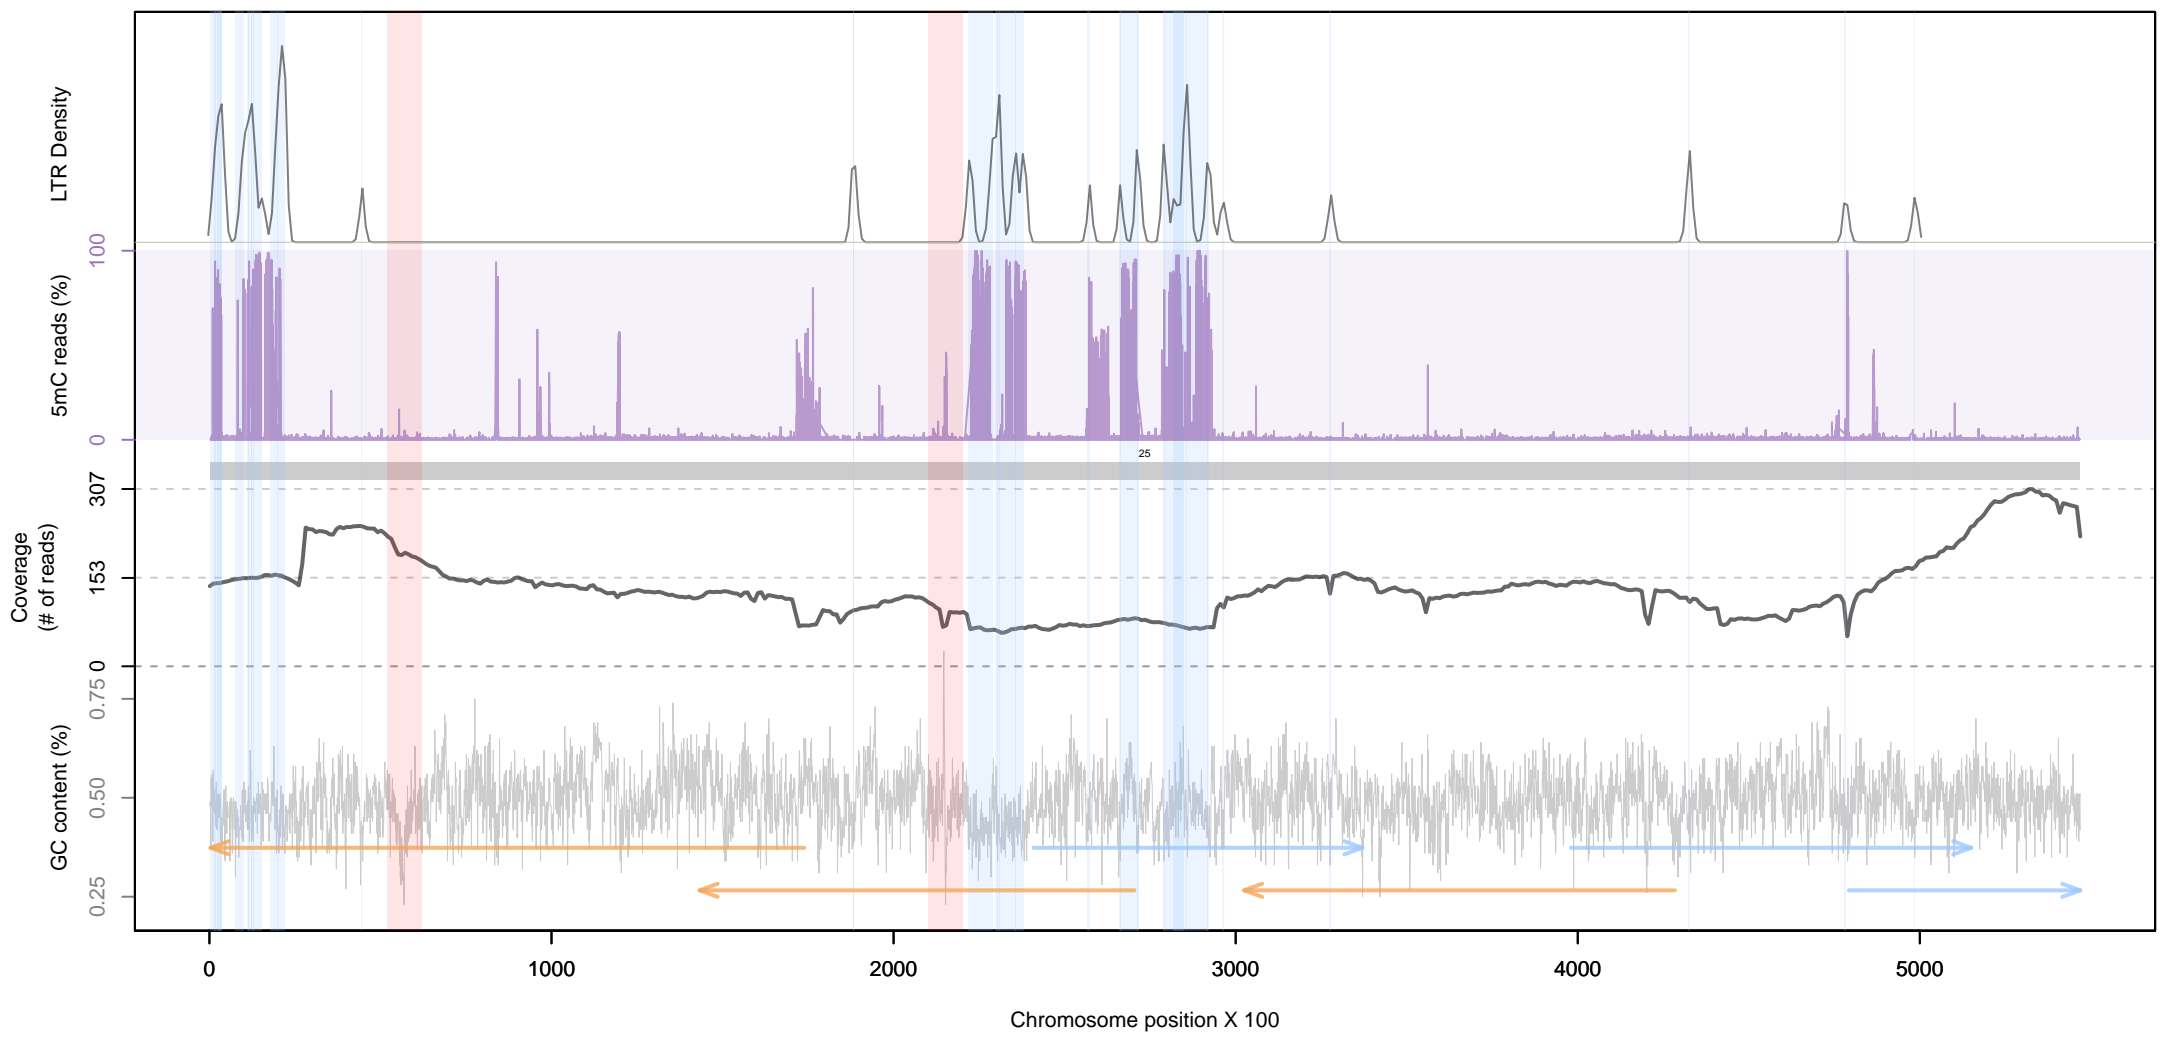

# Chromosome 25

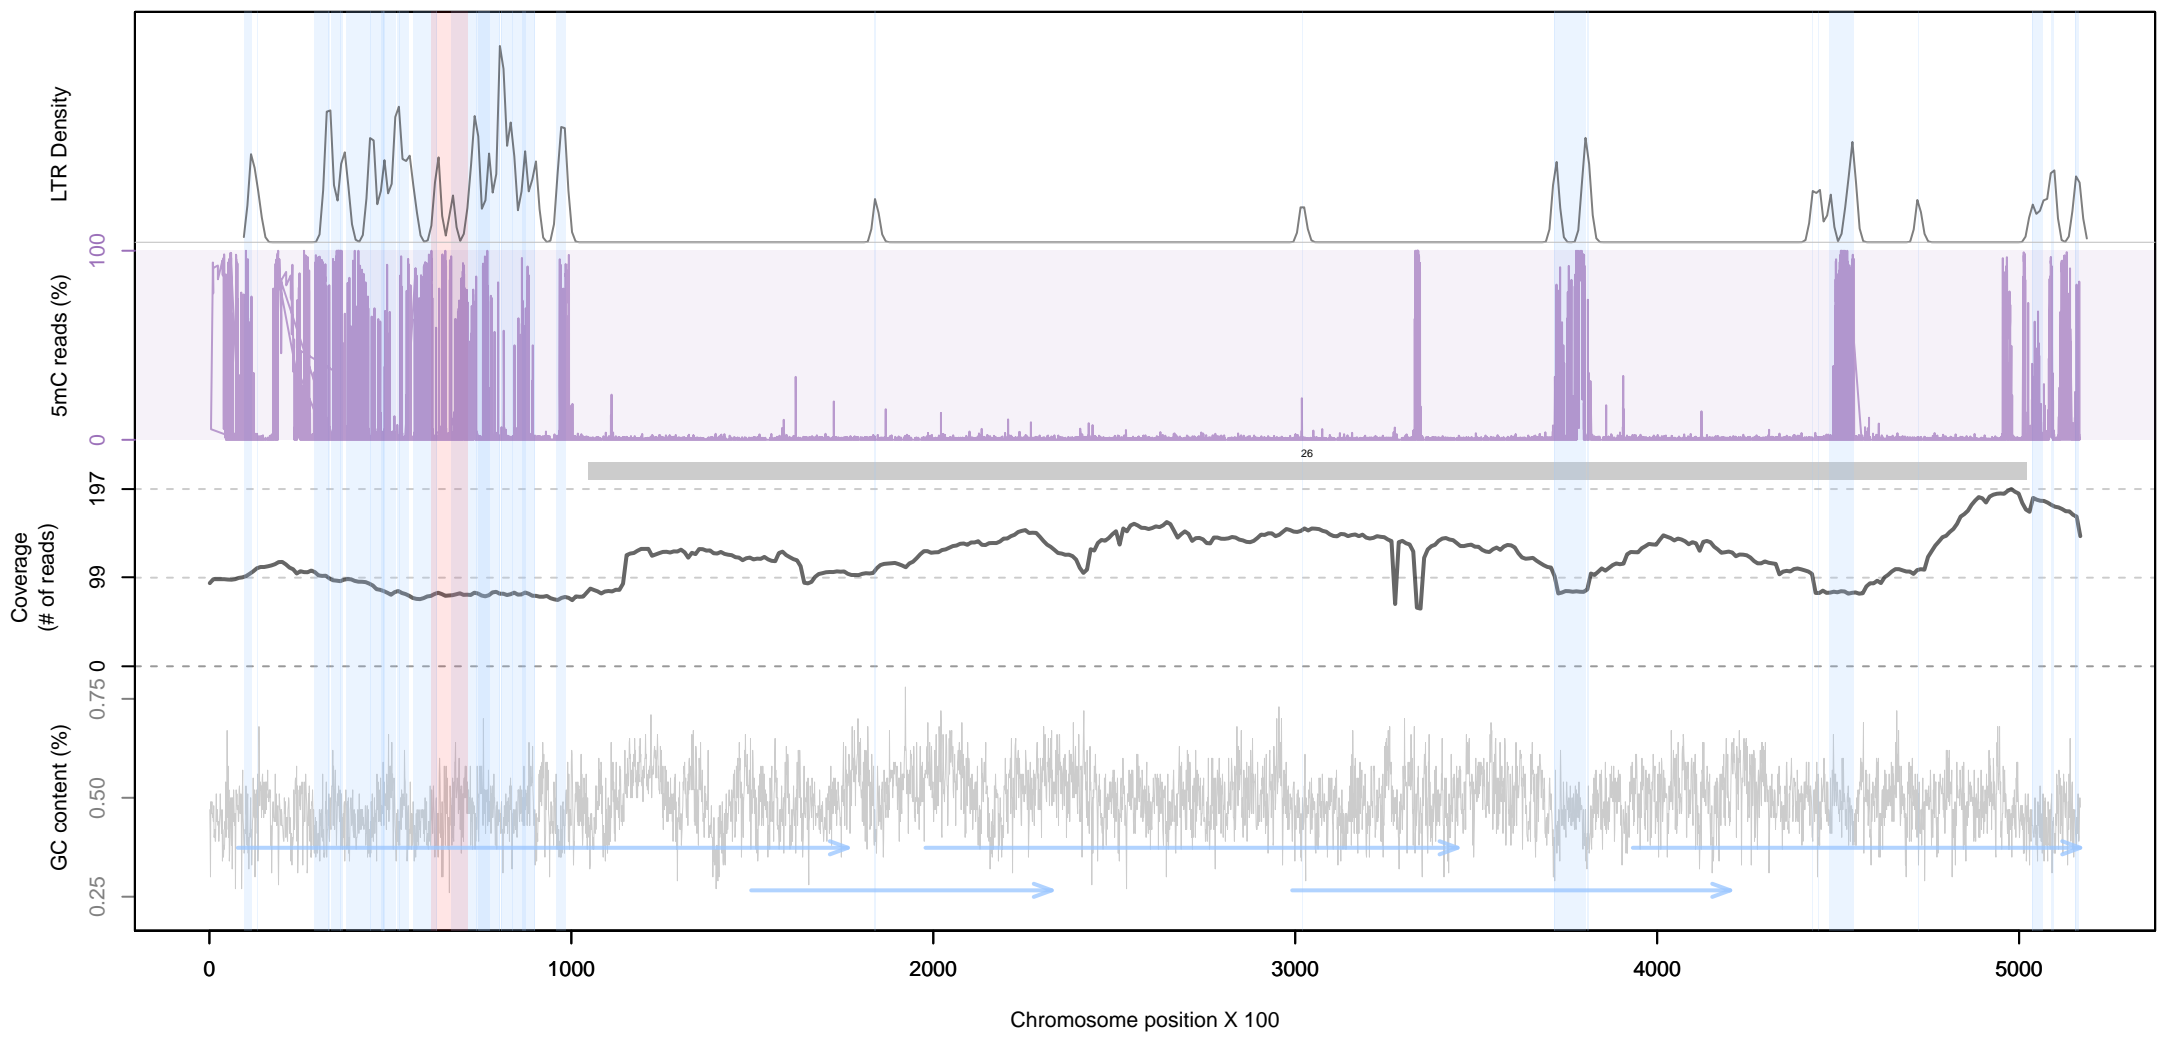

Supplement: supplemental_figure_S2.pdf [file supplemental_figure_S2.pdf]
