# Supplementary material for: Telomere-to-telomere genome assembly of Phaeodactylum tricornutum
Source: PeerJ journal article supplement (doi:10.7717/peerj.13607), 2022-07-05
Supplement: supplemental_figure_S1.pdf [file supplemental_figure_S1.pdf]

A) Read lengths vs Average read quality plot

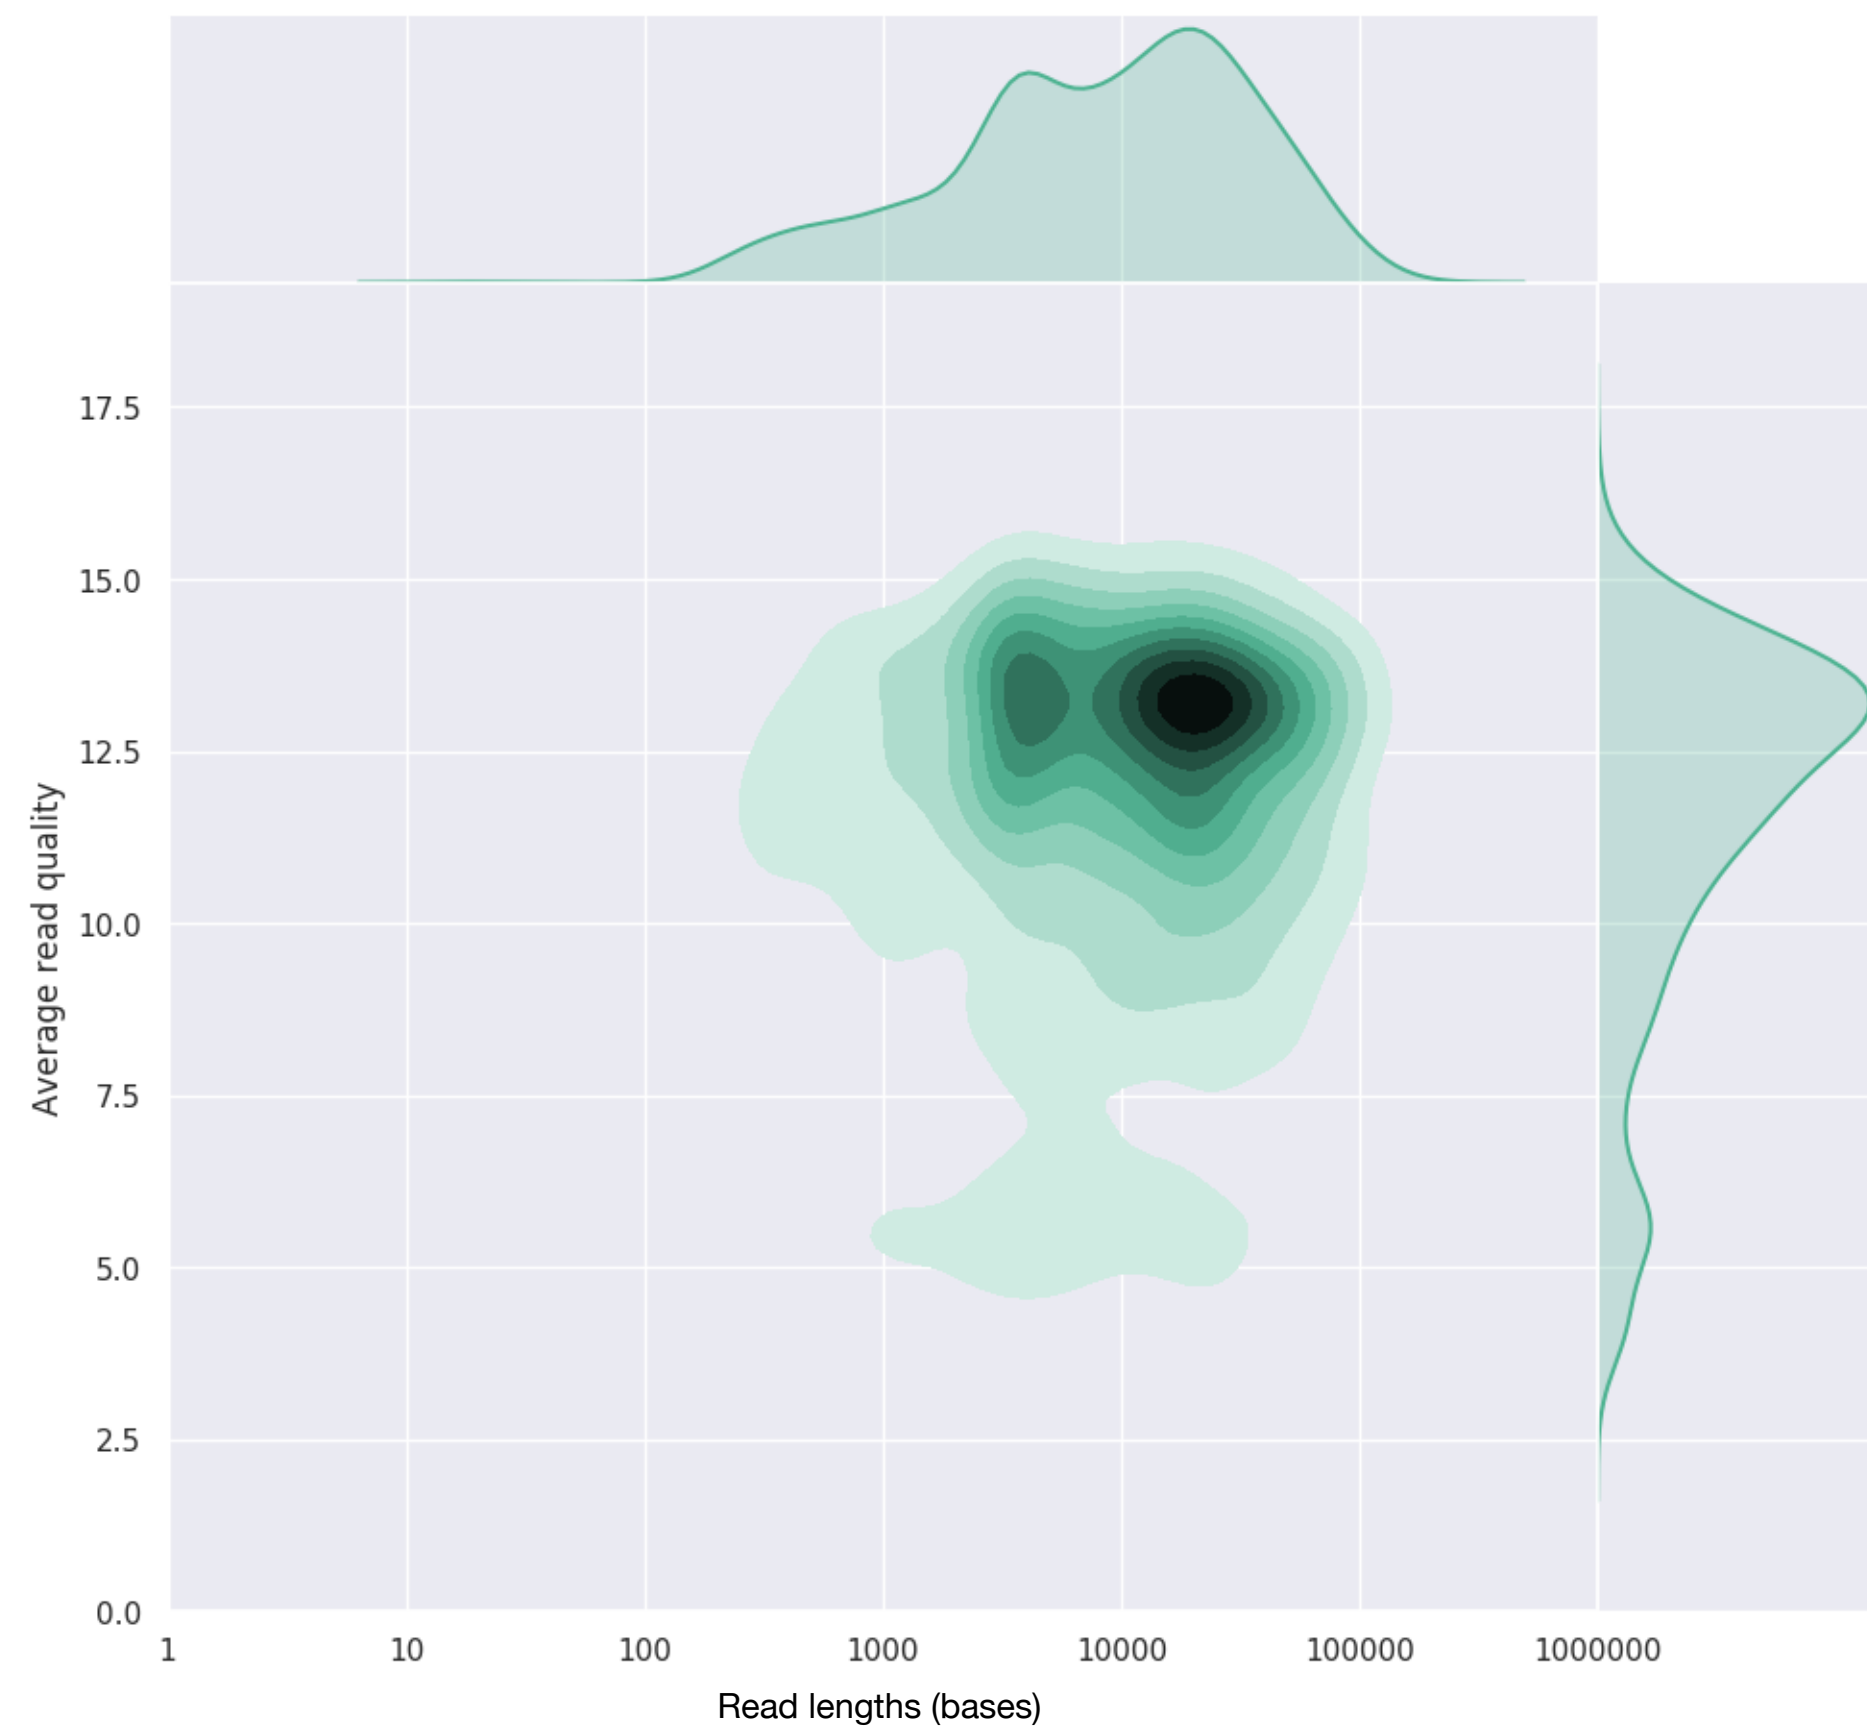

B) Yield by length

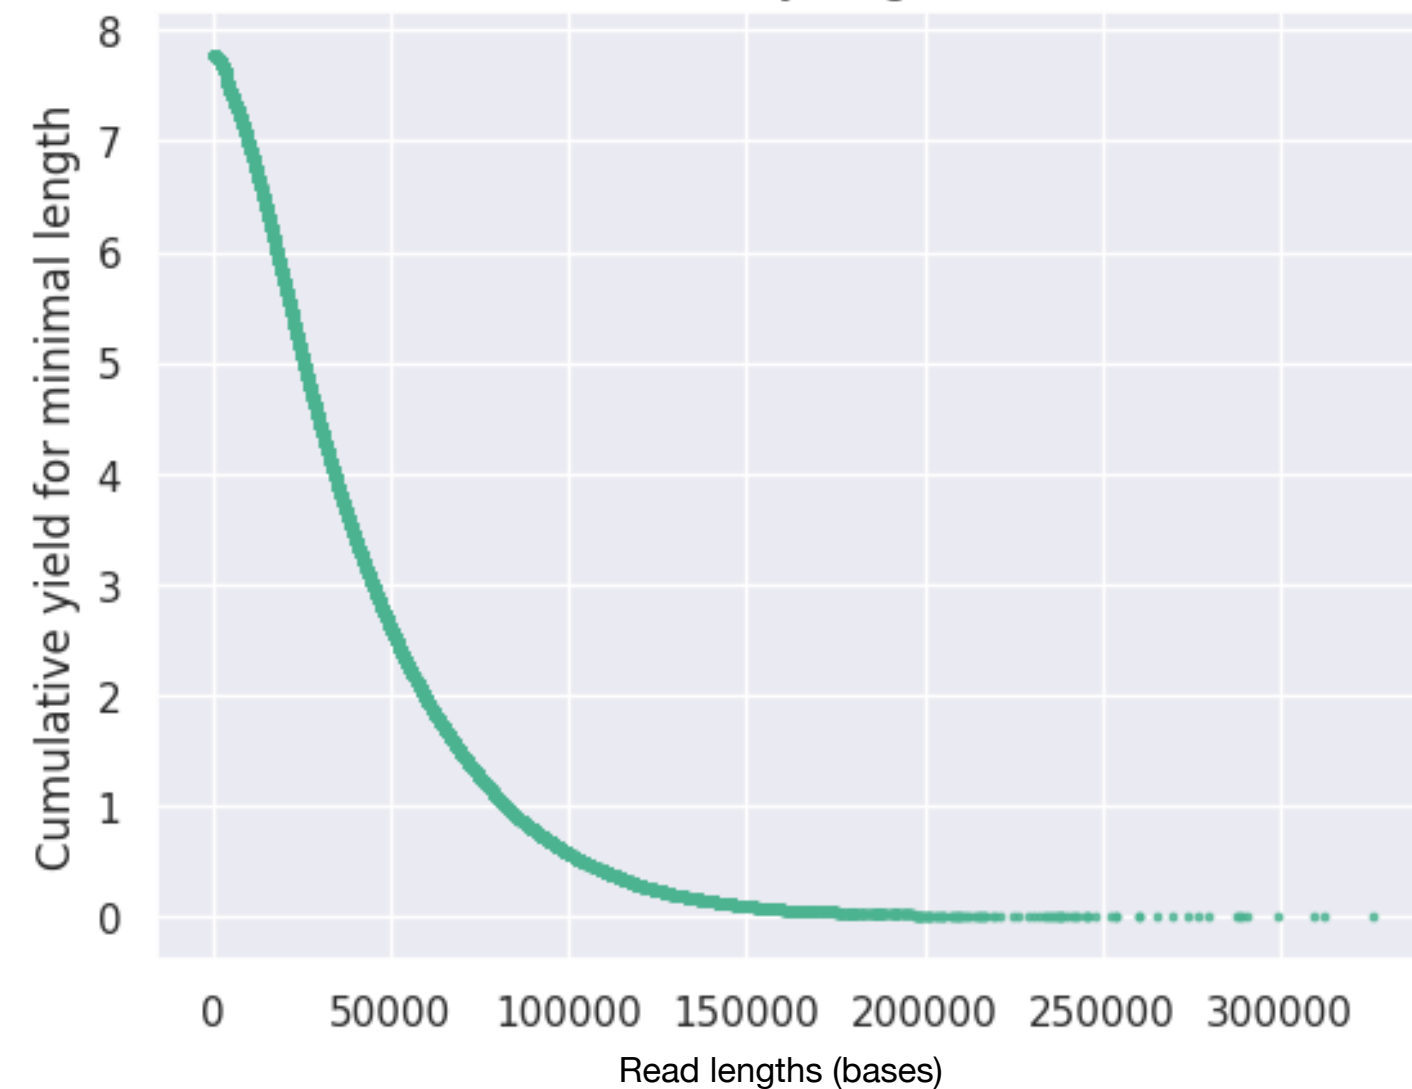

C)

|                      |               |
|----------------------|---------------|
| Read length N50:     | 35,035        |
| Number of reads:     | 438,929       |
| Median read quality: | 12.3          |
| Total bases:         | 7,785,091,135 |

Supplemental Figure S1: Quality of Nanopore sequencing data. A) Read length vs. average read quality calculated by NanoPlot (axis titles are modified). B) Yield by length vs. read length as reported by NanoPlot (axis titles are modified). C) Run information as reported by NanoPlot.
