# Supplementary material for: Telomere-to-telomere genome assembly of Phaeodactylum tricornutum
Source: PeerJ journal article supplement (doi:10.7717/peerj.13607), 2022-07-05

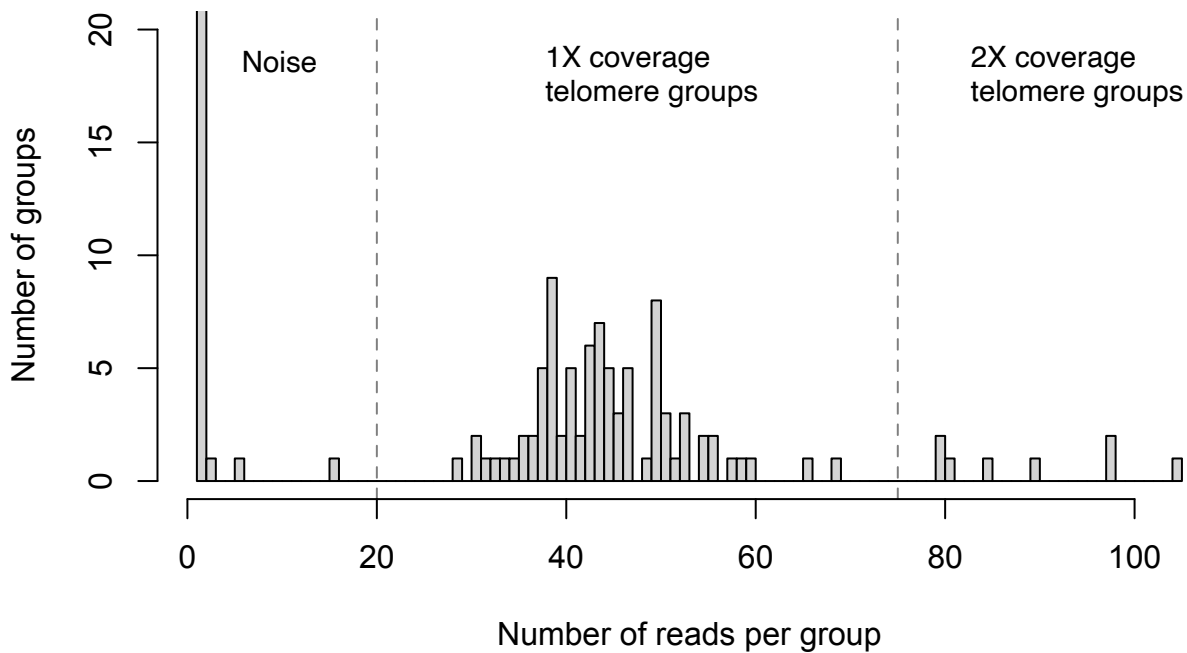

Supplement: supplemental_figure_S3.pdf [file supplemental_figure_S3.pdf]
